# Supplementary material
Source: ML conference proceedings conference paper supplement (https://proceedings.mlr.press/v95/li18e.html)
Supplement: Supplementary file [file li18e-supp.pdf]

# Construction of Incoherent Dictionaries via Direct Babel Function Minimization: Supplementary Material

Huan Li and Zhouchen Lin

## 1. Proof in Section 2

**Theorem 1** *Assume that  $\{\mathbf{X}^k, \mathbf{Y}^k, \mathbf{W}^k\}$  is bounded,  $\epsilon_k \rightarrow 0$  and  $\mathbf{W}^* \mathbf{V}_{i,:}^T \mathbf{V}_{i,:}$ ,  $i = 1, \dots, n$ , are linear dependent. Let  $(\mathbf{X}^*, \mathbf{Y}^*, \mathbf{W}^*)$  be an accumulation point of  $(\mathbf{X}^k, \mathbf{Y}^k, \mathbf{W}^k)$ , then  $(\mathbf{X}^*, \mathbf{Y}^*, \mathbf{W}^*)$  is a KKT point of problem (7)*

**Proof** We first prove that  $\mathbf{X}^*, \mathbf{Y}^*, \mathbf{W}^*$  is feasible. Since  $\{\mathbf{X}^k\}$ ,  $\{\mathbf{Y}^k\}$  and  $\{\mathbf{W}^k\}$  are bounded, then there exists  $\mathbf{X}^*, \mathbf{Y}^*, \mathbf{W}^*$  and infinite subsequence  $\mathbf{K}$  such that  $\lim_{k \in \mathbf{K}} \mathbf{X}^{k+1} = \mathbf{X}^*$ ,  $\lim_{k \in \mathbf{K}} \mathbf{Y}^{k+1} = \mathbf{Y}^*$  and  $\lim_{k \in \mathbf{K}} \mathbf{W}^{k+1} = \mathbf{W}^*$ .

If  $\{\rho^k\}$  is bounded, then  $\rho$  is not updated from some iteration. So  $\lim_{k \rightarrow \infty} \|\mathbf{X}^k - \mathbf{Y}^k\|_F$  and  $\lim_{k \rightarrow \infty} \|\mathbf{Y}^k - \mathbf{V}\mathbf{W}^k\mathbf{V}^T + \mathbf{I}\|_F = 0$ . We can have  $\mathbf{X}^* = \mathbf{Y}^*$  and  $\mathbf{Y}^* = \mathbf{V}\mathbf{W}^*\mathbf{V}^T - \mathbf{I}$ .

Now we consider the case that  $\{\rho^k\}$  is unbounded. From step 1, we have

$$\sigma_1^k \in \partial f(\mathbf{X}^{k+1}) + \Lambda_1^k + \rho^k(\mathbf{X}^{k+1} - \mathbf{Y}^{k+1}), \quad (1a)$$

$$\sigma_2^k + \Lambda_1^k - \Lambda_2^k + \rho^k(\mathbf{X}^{k+1} - \mathbf{Y}^{k+1}) - \rho^k(\mathbf{Y}^{k+1} - \mathbf{V}\mathbf{W}^{k+1}\mathbf{V}^T + \mathbf{I}) \in \sum_{i=1}^n N_{\Pi_i}(\mathbf{Y}^{k+1}), \quad (1b)$$

$$\sigma_3^k + \mathbf{V}^T \Lambda_2^k \mathbf{V} + \rho^k \mathbf{V}^T (\mathbf{Y}^{k+1} - \mathbf{V}\mathbf{W}^{k+1}\mathbf{V}^T + \mathbf{I}) \mathbf{V} \in N_{\mathbf{S}_+}(\mathbf{W}^{k+1}) + N_{\mathbf{S}_m}(\mathbf{W}^{k+1}), \quad (1c)$$

where  $N_{\mathbf{S}}(\mathbf{W})$  is the normal cone of  $\mathbf{S}$  at  $\mathbf{W} \in \mathbf{S}$ ,  $\mathbf{S}_+ = \{\mathbf{W} \in \mathbf{R}^{r \times r} : \mathbf{W} = \mathbf{W}^T, \mathbf{W} \succeq 0\}$ ,  $\mathbf{S}_m = \{\mathbf{W} \in \mathbf{R}^{r \times r} : \text{rank}(\mathbf{W}) \leq m\}$ ,  $\Pi_i = \{\mathbf{Y} \in \mathbf{R}^{n \times n} : e_i^T \mathbf{Y} e_i = 0\}$  and we use  $\partial \delta_{\mathbf{S}}(\mathbf{W}) = N_{\mathbf{S}}(\mathbf{W})$ . Here we replace  $\Omega$  with  $\mathbf{S}_+ \cap \mathbf{S}_m$ ,  $\Pi$  with  $\Pi_1 \cap \dots \cap \Pi_n$ .

Divide both sides by  $\rho^k$  in (1a) and let  $k \rightarrow \infty$ ,  $k \in \mathbf{K}$ . From  $\sigma_1^k \rightarrow 0$ , the boundedness of  $\partial f(\mathbf{X}^{k+1})$  and  $\Lambda_1^k$ , we have  $\mathbf{X}^* - \mathbf{Y}^* = 0$ .

Divide both sides by  $\rho^k$  in (1b) and let  $k \rightarrow \infty$ ,  $k \in \mathbf{K}$ . From  $\sigma_2^k \rightarrow 0$ ,  $\mathbf{X}^* = \mathbf{Y}^*$ , the boundedness of  $\Lambda_1^k$  and  $\Lambda_2^k$ , we have  $-(\mathbf{Y}^* - \mathbf{V}\mathbf{W}^*\mathbf{V}^T + \mathbf{I}) \in \sum_{i=1}^n N_{\Pi_i}(\mathbf{Y}^*)$ . Since  $N_{\Pi_i}(\mathbf{Y}^*) = \{\lambda e_i e_i^T : \lambda \in \mathbf{R}\}$ , thus there exists  $\lambda_i^*$ ,  $i = 1, \dots, n$  such that  $\mathbf{Y}^* - \mathbf{V}\mathbf{W}^*\mathbf{V}^T + \mathbf{I} = \sum_{i=1}^n \lambda_i^* e_i e_i^T$ .

Divide both sides by  $\rho^k$  in (1c) and let  $k \rightarrow \infty$ ,  $k \in \mathbf{K}$ . From  $\sigma_3^k \rightarrow 0$ ,  $\mathbf{Y}^* - \mathbf{V}\mathbf{W}^*\mathbf{V}^T + \mathbf{I} = \sum_{i=1}^n \lambda_i^* e_i e_i^T$  and the boundedness of  $\Lambda_2^k$ , we have  $\sum_{i=1}^n \lambda_i^* \mathbf{V}^T e_i e_i^T \mathbf{V} = \sum_{i=1}^n \lambda_i^* \mathbf{V}_{i,:}^T \mathbf{V}_{i,:} \in N_{\mathbf{S}_+}(\mathbf{W}^*) + N_{\mathbf{S}_m}(\mathbf{W}^*)$ . Since  $N_{\mathbf{S}_+}(\mathbf{W}) = \{\hat{\mathbf{W}} \in \mathbf{S}_+ : \hat{\mathbf{W}}\mathbf{W}^T = 0\}$  (Fletcher, 1985) and  $N_{\mathbf{S}_m}(\mathbf{W}) = \{\hat{\mathbf{W}} \in \mathbf{R}^{r \times r} : \ker(\hat{\mathbf{W}})^\perp \cap \ker(\mathbf{W})^\perp = \{0\}, \text{rank}(\hat{\mathbf{W}}) \leq r - m\} = \{\hat{\mathbf{W}} \in \mathbf{R}^{r \times r} : \hat{\mathbf{W}}\mathbf{W}^T = 0, \text{rank}(\hat{\mathbf{W}}) \leq r - m\}$  (Luke, 2013), then  $(\hat{\mathbf{W}}_1 + \hat{\mathbf{W}}_2)\mathbf{W}^T = 0$  if  $\hat{\mathbf{W}}_1 \in N_{\mathbf{S}_+}(\mathbf{W})$  and  $\hat{\mathbf{W}}_2 \in N_{\mathbf{S}_m}(\mathbf{W})$ . So we can have  $0 = \sum_{i=1}^n \lambda_i^* \mathbf{V}_{i,:}^T \mathbf{V}_{i,:} (\mathbf{W}^*)^T = \sum_{i=1}^n \lambda_i^* \mathbf{W}^* \mathbf{V}_{i,:}^T \mathbf{V}_{i,:}$ . From the assumption, we have  $\lambda_i^* = 0, i = 1, \dots, n$ . So  $\mathbf{Y}^* - \mathbf{V}\mathbf{W}^*\mathbf{V}^T + \mathbf{I} = 0$ .

Now we prove that  $\mathbf{X}^*, \mathbf{Y}^* \mathbf{W}^*$  is a KKT point. From (1a)-(1c), the definition of  $\hat{\Lambda}_1^{k+1}$  and  $\hat{\Lambda}_2^{k+1}$ , we have

$$\sigma_1^k \in \partial f(\mathbf{X}^{k+1}) + \hat{\Lambda}_1^{k+1}, \quad (2)$$

$$\sigma_2^k + \hat{\Lambda}_1^{k+1} - \hat{\Lambda}_2^{k+1} \in \sum_{i=1}^n N_{\Pi_i}(\mathbf{Y}^{k+1}), \quad (3)$$

$$\sigma_3^k + \mathbf{V}^T \hat{\Lambda}_2^{k+1} \mathbf{V} \in N_{\mathbf{S}_+}(\mathbf{W}^{k+1}) + N_{\mathbf{S}_m}(\mathbf{W}^{k+1}). \quad (4)$$

Since  $\partial f(\mathbf{X}^{k+1})$  is bounded, thus  $\hat{\Lambda}_1^{k+1}$  must be bounded. There exists  $\hat{\Lambda}_1^*$  and infinite subsequence  $\mathbf{K}_1 \in \mathbf{K}$  such that  $\lim_{k \in \mathbf{K}_1} \hat{\Lambda}_1^{k+1} = \hat{\Lambda}_1^*$ . From  $\delta^k \rightarrow 0$  we have  $-\hat{\Lambda}_1^* \in \partial f(\mathbf{X}^*)$ .

Now we consider two cases of  $\{\hat{\Lambda}_2^{k+1}\}$ .

If  $\{\|\hat{\Lambda}_2^{k+1}\|_\infty\}$  is bounded, then there exists  $\hat{\Lambda}_2^*$  and infinite subsequence  $\mathbf{K}_2 \in \mathbf{K}_1$  such that  $\lim_{k \in \mathbf{K}_2} \hat{\Lambda}_2^{k+1} = \hat{\Lambda}_2^*$ ,  $\hat{\Lambda}_1^* - \hat{\Lambda}_2^* \in \sum_{i=1}^n N_{\Pi_i}(\mathbf{Y}^*)$  and  $\mathbf{V}^T \hat{\Lambda}_2^* \mathbf{V} \in N_{\mathbf{S}_+}(\mathbf{W}^*) + N_{\mathbf{S}_m}(\mathbf{W}^*)$ , which together with  $-\hat{\Lambda}_1^* \in \partial f(\mathbf{X}^*)$  and the feasibility, is the KKT condition.

If  $\{\|\hat{\Lambda}_2^{k+1}\|_\infty\}$  is unbounded, divide both sides of (3) and (4) by  $\|\hat{\Lambda}_2^{k+1}\|_\infty$ , we have

$$\begin{aligned} \frac{\sigma_2^k}{\|\hat{\Lambda}_2^{k+1}\|_\infty} + \frac{\hat{\Lambda}_1^{k+1}}{\|\hat{\Lambda}_2^{k+1}\|_\infty} - \frac{\hat{\Lambda}_2^{k+1}}{\|\hat{\Lambda}_2^{k+1}\|_\infty} &\in \sum_{i=1}^n N_{\Pi_i}(\mathbf{Y}^{k+1}), \\ \frac{\sigma_3^k}{\|\hat{\Lambda}_2^{k+1}\|_\infty} + \frac{\mathbf{V}^T \hat{\Lambda}_2^{k+1} \mathbf{V}}{\|\hat{\Lambda}_2^{k+1}\|_\infty} &\in N_{\mathbf{S}_+}(\mathbf{W}^{k+1}) + N_{\mathbf{S}_m}(\mathbf{W}^{k+1}). \end{aligned}$$

Since  $\frac{\hat{\Lambda}_2^{k+1}}{\|\hat{\Lambda}_2^{k+1}\|_\infty}$  is bounded, then there exists  $\mathbf{K}_3 \in \mathbf{K}_1$  such that  $\lim_{k \in \mathbf{K}_3} \frac{\hat{\Lambda}_2^{k+1}}{\|\hat{\Lambda}_2^{k+1}\|_\infty} = \bar{\Lambda}_2^*$  and  $\|\bar{\Lambda}_2^*\|_\infty = 1$ . So there exists  $\lambda_i$  such that  $\bar{\Lambda}_2^* = \sum_{i=1}^n \lambda_i e_i e_i^T$  and  $\mathbf{V}^T \bar{\Lambda}_2^* \mathbf{V} \in N_{\mathbf{S}_+}(\mathbf{W}^*) + N_{\mathbf{S}_m}(\mathbf{W}^*)$ , which leads to  $\sum_{i=1}^n \lambda_i \mathbf{W}^* \mathbf{V}_{i,:}^T \mathbf{V}_{i,:} = 0$ . From the assumption we have  $\lambda_i = 0, i = 1, \dots, n$  and  $\bar{\Lambda}_2^* = 0$ , which contradicts with  $\|\bar{\Lambda}_2^*\|_\infty = 1$ .  $\blacksquare$

### 1.1. Details of Step 1 in ALM-BF

We can use the Proximal Alternating Minimization method [Bolte et al. \(2014\)](#) to solve the following subproblem in step 1 of ALM-BF:

$$\min_{\mathbf{X}, \mathbf{Y}, \mathbf{W}} L(\mathbf{X}, \mathbf{Y}, \mathbf{W}, \Lambda_1^k, \Lambda_2^k) \quad (5)$$

which consists of three steps in each iteration:

$$\begin{aligned}
 \mathbf{X}^{k,t+1} &= \underset{\mathbf{X}}{\operatorname{argmin}} L(\mathbf{X}, \mathbf{Y}^{k,t}, \mathbf{W}^{k,t}, \Lambda_1^k, \Lambda_2^k) + \frac{\tau}{2} \|\mathbf{X} - \mathbf{X}^{k,t}\|_F^2 \\
 &= \operatorname{Prox}_{\frac{1}{\rho^k} \|\cdot\|_{\infty, \max_p}} \left( (\rho^k \mathbf{Y}^{k,t} - \Lambda_1^k + \tau \mathbf{X}^{k,t}) / (\rho^k + \tau) \right), \\
 \mathbf{Y}^{k,t+1} &= \underset{\mathbf{Y}}{\operatorname{argmin}} L(\mathbf{X}^{k,t+1}, \mathbf{Y}, \mathbf{W}^{k,t}, \Lambda_1^k, \Lambda_2^k) + \frac{\tau}{2} \|\mathbf{Y} - \mathbf{Y}^{k,t}\|_F^2 \\
 &= \operatorname{Proj}_{\Pi} \left( (\rho^k \mathbf{X}^{k,t+1} + \Lambda_1^k + \rho^k \mathbf{V} \mathbf{W}^{k,t} \mathbf{V}^T - \rho^k \mathbf{I} - \Lambda_2^k + \tau \mathbf{Y}^{k,t}) / (2\rho^k + \tau) \right), \\
 \mathbf{W}^{k,t+1} &= \underset{\mathbf{W}}{\operatorname{argmin}} L(\mathbf{X}^{k,t+1}, \mathbf{Y}^{k,t+1}, \mathbf{W}, \Lambda_1^k, \Lambda_2^k) + \frac{\tau}{2} \|\mathbf{W} - \mathbf{W}^{k,t}\|_F^2 \\
 &= \underset{\mathbf{W}}{\operatorname{argmin}} \delta_{\Omega}(\mathbf{W}) + \frac{\rho}{2} \left\| \mathbf{V} \mathbf{W} \mathbf{V}^T - \left( \mathbf{Y}^{k,t+1} + \mathbf{I} + \frac{\Lambda_2^k}{\rho} \right) \right\|_F^2 + \frac{\tau}{2} \|\mathbf{W} - \mathbf{W}^{k,t}\|_F^2 \\
 &= \underset{\mathbf{W}}{\operatorname{argmin}} \delta_{\Omega}(\mathbf{W}) + \frac{\rho}{2} \left\| \mathbf{W} - \mathbf{V}^T \left( \mathbf{Y}^{k,t+1} + \mathbf{I} + \frac{\Lambda_2^k}{\rho} \right) \mathbf{V} \right\|_F^2 + \frac{\tau}{2} \|\mathbf{W} - \mathbf{W}^{k,t}\|_F^2 \\
 &= \operatorname{Proj}_{\Omega} \left( (\mathbf{V}^T (\rho^k \mathbf{Y}^{k,t+1} + \rho^k \mathbf{I} + \Lambda_2^k) \mathbf{V} + \tau \mathbf{W}^{k,t}) / (\rho^k + \tau) \right),
 \end{aligned}$$

where we use

$$\begin{aligned}
 \|\mathbf{V} \mathbf{W} \mathbf{V}^T - \mathbf{Z}\|_F^2 &= \operatorname{trace}((\mathbf{V} \mathbf{W}^T \mathbf{V}^T - \mathbf{Z}^T)(\mathbf{V} \mathbf{W} \mathbf{V}^T - \mathbf{Z})) \\
 &= \operatorname{trace}(\mathbf{V} \mathbf{W}^T \mathbf{V}^T \mathbf{V} \mathbf{W} \mathbf{V}^T) - 2\operatorname{trace}(\mathbf{V} \mathbf{W}^T \mathbf{V}^T \mathbf{Z}) + \operatorname{trace}(\mathbf{Z}^T \mathbf{Z}) \\
 &= \operatorname{trace}(\mathbf{V} \mathbf{W}^T \mathbf{W} \mathbf{V}^T) - 2\operatorname{trace}(\mathbf{V} \mathbf{W}^T \mathbf{V}^T \mathbf{Z}) + \operatorname{trace}(\mathbf{Z}^T \mathbf{Z}) \\
 &= \operatorname{trace}(\mathbf{V}^T \mathbf{V} \mathbf{W}^T \mathbf{W}) - 2\operatorname{trace}(\mathbf{W}^T \mathbf{V}^T \mathbf{Z} \mathbf{V}) + \operatorname{trace}(\mathbf{Z}^T \mathbf{Z}) \\
 &= \operatorname{trace}(\mathbf{W}^T \mathbf{W}) - 2\operatorname{trace}(\mathbf{W}^T \mathbf{V}^T \mathbf{Z} \mathbf{V}) + \operatorname{trace}(\mathbf{Z}^T \mathbf{Z}) \\
 &= \|\mathbf{W} - \mathbf{V}^T \mathbf{Z} \mathbf{V}\|_F^2 - \|\mathbf{V}^T \mathbf{Z} \mathbf{V}\|_F^2 + \|\mathbf{Z}\|_F^2
 \end{aligned}$$

and  $\mathbf{V}^T \mathbf{V} = \mathbf{I}$  in the  $\mathbf{W}$  update step. For an Arbitrary matrix  $\mathbf{Z}$ ,

$$\begin{aligned}
 \operatorname{Proj}_{\Omega}(\mathbf{Z}) &= \underset{\mathbf{W} \in \Omega}{\operatorname{argmin}} \|\mathbf{W} - \mathbf{Z}\|_F^2 = \underset{\mathbf{W} \in \Omega}{\operatorname{argmin}} \left\| \mathbf{W} - \frac{\mathbf{Z} + \mathbf{Z}^T}{2} - \frac{\mathbf{Z} - \mathbf{Z}^T}{2} \right\|_F^2 \\
 &= \underset{\mathbf{W} \in \Omega}{\operatorname{argmin}} \left\| \mathbf{W} - \frac{\mathbf{Z} + \mathbf{Z}^T}{2} \right\|_F^2 + \left\| \frac{\mathbf{Z} - \mathbf{Z}^T}{2} \right\|_F^2,
 \end{aligned}$$

where we use  $\operatorname{trace}(\mathbf{A} \mathbf{B}) = 0$  if  $\mathbf{A} = \mathbf{A}^T$  and  $\mathbf{B} = -\mathbf{B}^T$ . Let  $\mathbf{U} \Sigma \mathbf{U}^T$  be the eigenvalue decomposition of  $\frac{\mathbf{Z} + \mathbf{Z}^T}{2}$  with an non-increasing order of the diagonal of  $\Sigma$  and  $\hat{\Sigma} = \operatorname{diag}([\max\{0, \Sigma_{1,1}\}, \dots, \max\{0, \Sigma_{m,m}\}, 0, \dots, 0])$ . Then  $\operatorname{Proj}_{\Omega}(\mathbf{Z}) = \mathbf{U} \hat{\Sigma} \mathbf{U}^T$ .

## 2. Proof in Section 3

**Lemma 2** *Let  $\mathbf{X}^* = \operatorname{Proj}_{\|\cdot\|_{\infty, \max_p} \leq 1}(\rho \mathbf{Y})$ , then we have  $\operatorname{Prox}_{\frac{1}{\rho} \|\cdot\|_{\infty, \max_p}}(\mathbf{Y}) = \mathbf{Y} - \frac{\mathbf{X}^*}{\rho}$ .*

**Proof** From the definition of Fenchel dual, we have

$$\|\mathbf{Z}\|_{\infty, \max_p} = \max_{\|\mathbf{X}\|_{\infty, \max_p} \leq 1} \langle \mathbf{Z}, \mathbf{X} \rangle.$$

Then we have

$$\begin{aligned}
 & \min_{\mathbf{Z}} \|\mathbf{Z}\|_{\infty, \max_p} + \frac{\rho}{2} \|\mathbf{Z} - \mathbf{Y}\|_F^2 \\
 = & \min_{\mathbf{Z}} \max_{\|\mathbf{X}\|_{\infty, \max_p}^* \leq 1} \langle \mathbf{Z}, \mathbf{X} \rangle + \frac{\rho}{2} \|\mathbf{Z} - \mathbf{Y}\|_F^2 \\
 = & \min_{\mathbf{Z}} \max_{\|\mathbf{X}\|_{\infty, \max_p}^* \leq 1} \frac{\rho}{2} \left\| \mathbf{Z} - \mathbf{Y} + \frac{\mathbf{X}}{\rho} \right\|_F^2 + \langle \mathbf{Y}, \mathbf{X} \rangle - \frac{\|\mathbf{X}\|_F^2}{2\rho} \\
 = & \max_{\|\mathbf{X}\|_{\infty, \max_p}^* \leq 1} \min_{\mathbf{Z}} \frac{\rho}{2} \left\| \mathbf{Z} - \mathbf{Y} + \frac{\mathbf{X}}{\rho} \right\|_F^2 + \langle \mathbf{Y}, \mathbf{X} \rangle - \frac{\|\mathbf{X}\|_F^2}{2\rho} \\
 = & \max_{\|\mathbf{X}\|_{\infty, \max_p}^* \leq 1} \langle \mathbf{Y}, \mathbf{X} \rangle - \frac{\|\mathbf{X}\|_F^2}{2\rho}.
 \end{aligned}$$

Let  $\mathbf{X}^* = \text{Proj}_{\|\mathbf{X}\|_{\infty, \max_p}^* \leq 1}(\rho \mathbf{Y})$ , then we have  $\text{Prox}_{\frac{1}{\rho} \|\mathbf{Z}\|_{\infty, \max_p}}(\mathbf{Y}) = \mathbf{Y} - \frac{\mathbf{X}^*}{\rho}$ . ■

**Theorem 3** Let  $\|\mathbf{x}\|_{\max_p}^*$  and  $\|\mathbf{X}\|_{\infty, \max_p}^*$  be the Fenchel dual norm of  $\|\mathbf{x}\|_{\max_p}$  and  $\|\mathbf{X}\|_{\infty, \max_p}$ , respectively, then

$$\begin{aligned}
 \|\mathbf{x}\|_{\max_p}^* &= \max \left\{ \|\mathbf{x}\|_{\infty}, \frac{1}{p} \|\mathbf{x}\|_1 \right\} \equiv \|\mathbf{x}\|_{\max\{l_{\infty}, \frac{1}{p} l_1\}}, \\
 \|\mathbf{X}\|_{\infty, \max_p}^* &= \sum_{i=1}^n \|\mathbf{X}_{i,:}\|_{\max_p}^* \equiv \|\mathbf{X}\|_{1, \max\{l_{\infty}, \frac{1}{p} l_1\}}.
 \end{aligned}$$

**Proof** From the definition, we have  $\|\mathbf{x}\|_{\max_p}^* = \max_{\|\mathbf{z}\|_{\max_p} \leq 1} \mathbf{x}^T \mathbf{z}$ .

$$\begin{aligned}
 \mathbf{x}^T \mathbf{z} &\leq \sum_{i=1}^n |\mathbf{x}_i| |\mathbf{z}_i| \leq \sum_{i=1}^n |\mathbf{x}_{\delta(i)}| |\mathbf{z}_{\delta(i)}| = \sum_{i=1}^{p-1} |\mathbf{x}_{\delta(i)}| |\mathbf{z}_{\delta(i)}| + \sum_{i=p}^n |\mathbf{x}_{\delta(i)}| |\mathbf{z}_{\delta(i)}| \\
 &\leq \sum_{i=1}^{p-1} |\mathbf{x}_{\delta(i)}| |\mathbf{z}_{\delta(i)}| + |\mathbf{z}_{\delta(p)}| \sum_{i=p}^n |\mathbf{x}_{\delta(i)}|.
 \end{aligned}$$

From  $(|\mathbf{x}_{\delta(1)}| - |\mathbf{x}_{\delta(i)}|)(|\mathbf{z}_{\delta(i)}| - |\mathbf{z}_{\delta(p)}|) \geq 0, \forall i \leq p$ , we have

$$|\mathbf{x}_{\delta(1)}| (|\mathbf{z}_{\delta(i)}| - |\mathbf{z}_{\delta(p)}|) + |\mathbf{x}_{\delta(i)}| |\mathbf{z}_{\delta(p)}| \geq |\mathbf{x}_{\delta(i)}| |\mathbf{z}_{\delta(i)}|, \quad \forall i \leq p.$$

Do this operation for  $i = 1, \dots, p-1$  and sum, we have

$$\begin{aligned}
 \sum_{i=1}^{p-1} |\mathbf{x}_{\delta(i)}| |\mathbf{z}_{\delta(i)}| &\leq |\mathbf{x}_{\delta(1)}| \left( \sum_{i=1}^{p-1} |\mathbf{z}_{\delta(i)}| - (p-1) |\mathbf{z}_{\delta(p)}| \right) + |\mathbf{z}_{\delta(p)}| \sum_{i=1}^{p-1} |\mathbf{x}_{\delta(i)}| \\
 &\leq |\mathbf{x}_{\delta(1)}| (1 - |\mathbf{z}_{\delta(p)}| - (p-1) |\mathbf{z}_{\delta(p)}|) + |\mathbf{z}_{\delta(p)}| \sum_{i=1}^{p-1} |\mathbf{x}_{\delta(i)}|,
 \end{aligned}$$

where we use the constraint of  $\|\mathbf{z}\|_{max_p} \leq 1$ . So

$$\begin{aligned} \mathbf{x}^T \mathbf{z} &\leq |\mathbf{x}_{\delta(1)}|(1 - p|\mathbf{z}_{\delta(p)}|) + |\mathbf{z}_{\delta(p)}| \sum_{i=1}^{p-1} |\mathbf{x}_{\delta(i)}| + |\mathbf{z}_{\delta(p)}| \sum_{i=p}^n |\mathbf{x}_{\delta(i)}| \\ &= |\mathbf{x}_{\delta(1)}| + |\mathbf{z}_{\delta(p)}| \left( \sum_{i=1}^n |\mathbf{x}_{\delta(i)}| - p|\mathbf{x}_{\delta(1)}| \right) \\ &= \|\mathbf{x}\|_{\infty} + |\mathbf{z}_{\delta(p)}| (\|\mathbf{x}\|_1 - p\|\mathbf{x}\|_{\infty}). \end{aligned}$$

From  $\|\mathbf{z}\|_{max_p} \leq 1$ , we have  $0 \leq |\mathbf{z}_{\delta(p)}| \leq \frac{1}{p}$ .

If  $\|\mathbf{x}\|_1 \geq p\|\mathbf{x}\|_{\infty}$ , the maximal value is obtained at  $|\mathbf{z}_{\delta(p)}| = \frac{1}{p}$  and  $\mathbf{x}^T \mathbf{z} \leq \frac{1}{p}\|\mathbf{x}\|_1$ . When  $\mathbf{z}_i = \frac{1}{p}\text{sgn}(\mathbf{x}_i), \forall i = 1, \dots, n$ , the equality holds.

If  $\|\mathbf{x}\|_1 < p\|\mathbf{x}\|_{\infty}$ , the maximal value is obtained at  $\mathbf{z}_{\delta(p)} = 0$  and  $\mathbf{x}^T \mathbf{z} \leq \|\mathbf{x}\|_{\infty}$ . When  $\mathbf{z}_{\delta(1)} = \text{sgn}(\mathbf{x}_{\delta(1)})$  and  $\mathbf{z}_{\delta(i)} = 0, \forall i = 2, \dots, n$ , the equality holds.

So we have  $\|\mathbf{x}\|_{max_p}^* = \max \left\{ \|\mathbf{x}\|_{\infty}, \frac{1}{p}\|\mathbf{x}\|_1 \right\}$ .

Now consider  $\|\mathbf{X}\|_{\infty, max_p}^*$ , where  $\|\mathbf{X}\|_{\infty, max_p}^* = \max_{\|\mathbf{z}\|_{\infty, max_p} \leq 1} \text{tr}(\mathbf{X}^T \mathbf{Z})$  from the definition of Fenchel dual.

$$\text{tr}(\mathbf{X}^T \mathbf{Z}) \leq \sum_{i=1}^n \sum_{j=1}^n |\mathbf{X}_{i,j}| |\mathbf{Z}_{i,j}| \leq \sum_{i=1}^n \|\mathbf{X}_{i,:}\|_{max_p}^*.$$

When  $\|\mathbf{Z}_{i,:}\|_{max_p} = 1, \forall i = 1, \dots, n$ , the equality holds. ■

### 3. Proof in Section 4

The KKT conditions:

$$\mathbf{x}_i - \mathbf{z}_i + \alpha_i + \theta - \beta_i = 0, \tag{8}$$

$$\alpha_i \geq 0, \quad \mathbf{x}_i \leq t, \quad \langle \alpha_i, \mathbf{x}_i - t \rangle = 0, \tag{9}$$

$$\theta \geq 0, \quad \sum_{i=1}^n \mathbf{x}_i \leq pt, \quad \langle \theta, \sum_{i=1}^n \mathbf{x}_i - pt \rangle = 0, \tag{10}$$

$$\beta_i \geq 0, \quad \mathbf{x}_i \geq 0, \quad \langle \beta_i, \mathbf{x}_i \rangle = 0. \tag{11}$$

**Theorem 4** Let  $\{\mathbf{x}, \alpha, \theta, \beta\}$  be the KKT point,  $s = \text{num}(\mathbf{z}_i \geq t)$ , then we have

1. If  $\|\mathbf{z}\|_{\infty} \leq t$  and  $\|\mathbf{z}\|_1 \leq pt$ , then  $\mathbf{x} = \mathbf{z}$ .
2. If  $\|\mathbf{z}\|_{\infty} > t$  and  $\|\mathbf{z}\|_1 \leq pt$ , then  $\mathbf{x}_j = t$  if  $\mathbf{z}_j > t$ ;  $\mathbf{x}_j = \mathbf{z}_j$  if  $\mathbf{z}_j \leq t$ . And we have  $p > s$ .
3. If  $\|\mathbf{z}\|_{\infty} \leq t$  and  $\|\mathbf{z}\|_1 > pt$ , then  $\mathbf{x}_j = \mathbf{z}_j - \theta$  if  $\mathbf{z}_j > \theta$ ;  $\mathbf{x}_j = 0$  if  $\mathbf{z}_j \leq \theta$ .  $\sum_{\mathbf{z}_j > \theta} (\mathbf{z}_j - \theta) = pt$  and  $p \leq \text{num}(\mathbf{z}_j > \theta)$ .
4. If  $\|\mathbf{z}\|_{\infty} > t$  and  $\|\mathbf{z}\|_1 > pt$ , then  $\mathbf{x}_j = t$  if  $\mathbf{z}_j - \theta \geq t$ ;  $\mathbf{x}_j = \mathbf{z}_j - \theta$  if  $0 < \mathbf{z}_j - \theta < t$ ;  $\mathbf{x}_j = 0$  if  $\mathbf{z}_j \leq \theta$ . Specially,

- (a)  $\mathbf{z}_p - \mathbf{z}_{p+1} \geq t$ , then  $\mathbf{x}_j = t, \forall j \in [1, p]; \mathbf{x}_j = 0, \forall j \in [p+1, n]$ .
- (b)  $\mathbf{z}_p - \mathbf{z}_{p+1} < t$  and  $st + \sum_{\mathbf{z}_i < t} \mathbf{z}_i \leq pt$ , then  $\theta = 0$ .  $\mathbf{x}_j = t$  if  $\mathbf{z}_j \geq t$ ;  $\mathbf{x}_j = \mathbf{z}_j$  if  $\mathbf{z}_j < t$ . And we have  $p > s$ .
- (c)  $\mathbf{z}_p - \mathbf{z}_{p+1} < t$  and  $st + \sum_{\mathbf{z}_i < t} \mathbf{z}_i > pt$ , then  $\theta > 0$ .  $\mathbf{x}_j = t$  if  $\mathbf{z}_j - \theta \geq t$ ;  $\mathbf{x}_j = \mathbf{z}_j - \theta$  if  $0 < \mathbf{z}_j - \theta < t$ ;  $\mathbf{x}_j = 0$  if  $\mathbf{z}_j \leq \theta$ .  $\text{num}(\mathbf{z}_i - \theta \geq t) \times t + \sum_{0 < \mathbf{z}_i - \theta < t} (\mathbf{z}_i - \theta) = pt$ ,  $\text{num}(\mathbf{z}_i - \theta \geq t) < p < \text{num}(\mathbf{z}_i > \theta)$ .

Moreover,  $\sum_{i=1}^n \alpha_i + p\theta = \sum_{i=1}^p (\mathbf{z}_i - \mathbf{x}_i)$ .

**Proof** If  $\mathbf{x}_i > 0$ , then  $\beta_i = 0$  and  $\mathbf{x}_i = \mathbf{z}_i - \alpha_i - \theta \leq \mathbf{z}_i$  from (11) and (8). If  $\mathbf{x}_i = 0$ , we also have  $\mathbf{x}_i \leq \mathbf{z}_i$ . So  $\mathbf{x}_i \leq \mathbf{z}_i, \forall i$ .

Case 1:  $\|\mathbf{z}\|_\infty \leq t$  and  $\|\mathbf{z}\|_1 \leq pt$ .

If there exists  $j$  such that  $\mathbf{x}_j < \mathbf{z}_j$ , consider two cases: (1). If  $\mathbf{x}_j > 0$ , then  $\beta_j = 0$  and  $\mathbf{x}_j = \mathbf{z}_j - \alpha_j - \theta$ . So we have  $\alpha_j > 0$  or  $\theta > 0$ . If  $\alpha_j > 0$ , then  $\mathbf{x}_j = t$  from (9). So  $t < \mathbf{z}_j$ , which contradicts with  $\|\mathbf{z}\|_\infty \leq t$ . If  $\theta > 0$ , then  $\sum_{i=1}^n \mathbf{x}_i = pt$  from (10). Since  $\mathbf{x}_i \leq \mathbf{z}_i, \forall i$  and  $\mathbf{x}_j < \mathbf{z}_j$ , we have  $\sum_{i=1}^n \mathbf{x}_i < \sum_{i=1}^n \mathbf{z}_i$ . So  $pt < \sum_{i=1}^n \mathbf{z}_i$ , which contradicts with  $\|\mathbf{z}\|_1 \leq pt$ . (2). If  $\mathbf{x}_j = 0$ , then  $\alpha_j = 0$  from (9) and  $\theta = \mathbf{z}_j + \beta_j$  from (8). Since  $\mathbf{z}_j > \mathbf{x}_j = 0$ , so  $\theta > 0$  and  $\sum_{i=1}^n \mathbf{x}_i = pt$  from (10). So  $pt < \sum_{i=1}^n \mathbf{z}_i$ , which contradicts with  $\|\mathbf{z}\|_1 \leq pt$ . Thus we have  $\mathbf{x}_i = \mathbf{z}_i, \forall i$ .

Then we prove  $\sum_{i=1}^n \alpha_i + p\theta = \sum_{i=1}^p (\mathbf{z}_i - \mathbf{x}_i)$ . Since  $\mathbf{x}_i = \mathbf{z}_i, \forall i$ , we only need to prove  $\theta = 0$  and  $\alpha_i = 0, \forall i$ .

If there exists some  $\mathbf{x}_j$  such that  $\mathbf{x}_j > 0$ , then  $\beta_j = 0$  and  $\alpha_j + \theta = \mathbf{z}_j - \mathbf{x}_j = 0$  from (11) and (8). So  $\theta = 0$  and  $\alpha_j = 0$ . For  $\mathbf{x}_i = 0$ , if exists, then  $\alpha_i = 0$  from (9). So we have  $\theta = 0$  and  $\alpha_i = 0, \forall i$ .

If  $\mathbf{x}_i = 0, \forall i$ , then  $\alpha_i = 0$  and  $0 = \sum_{i=1}^n \mathbf{x}_i < pt$ , so  $\theta = 0$ .

Case 2:  $\|\mathbf{z}\|_\infty > t$  and  $\|\mathbf{z}\|_1 \leq pt$ .

(1). If  $\mathbf{x}_j = 0$ , then  $\alpha_j = 0$  and  $\theta = \mathbf{z}_j + \beta_j$ . If  $\mathbf{z}_j > 0$ , then  $\theta > 0$  and  $\sum_{i=1}^n \mathbf{x}_i = pt$ . So  $pt < \sum_{i=1}^n \mathbf{z}_i$ , which contradicts with  $\|\mathbf{z}\|_1 \leq pt$ . Thus we have  $\mathbf{z}_j = 0$ .

(2). If  $\mathbf{x}_j > 0$ , then  $\beta_j = 0$  and  $\mathbf{x}_j = \mathbf{z}_j - \alpha_j - \theta \leq \mathbf{z}_j$ .

If  $\theta > 0$ , then  $\sum_{i=1}^n \mathbf{x}_i = pt$  and  $\mathbf{x}_j < \mathbf{z}_j$ . Since  $\mathbf{x}_i \leq \mathbf{z}_i, \forall i$ , so  $pt = \sum_{i=1}^n \mathbf{x}_i < \sum_{i=1}^n \mathbf{z}_i$ , which contradicts with  $\|\mathbf{z}\|_1 \leq pt$ . So  $\theta = 0$ . Then  $\mathbf{x}_j = \mathbf{z}_j - \alpha_j$ . (a). Consider case  $\mathbf{z}_j \leq t$ . If  $\mathbf{x}_j \neq \mathbf{z}_j$ , then  $\mathbf{x}_j < \mathbf{z}_j$  and  $\alpha_j > 0$ , so  $\mathbf{x}_j = t$ , which contradicts with  $\mathbf{x}_j < \mathbf{z}_j \leq t$ . So  $\mathbf{x}_j = \mathbf{z}_j$ . (b). Consider case  $\mathbf{z}_j > t$ . If  $\mathbf{x}_j \neq t$ , then  $\alpha_j = 0$  and  $\mathbf{x}_j = \mathbf{z}_j > t$ , which contradicts with  $\mathbf{x}_j \leq t$ . So  $\mathbf{x}_j = t$ .

Since  $\|\mathbf{z}\|_\infty > t$ , then there exists  $\mathbf{x}_j = t < \mathbf{z}_j$ . So  $pt \geq \|\mathbf{z}\|_1 > \sum_{i=1}^n \mathbf{x}_i \geq \sum_{\mathbf{z}_i \geq t} t = st$ . So  $p > s$ .

Since  $\mathbf{x}_j = t > 0, \forall j \in [1, s]$ , then from the above analysis we have  $\theta = 0$  and  $\alpha_j = \mathbf{z}_j - \mathbf{x}_j, \forall j \in [1, s]$ . So we have  $\sum_{i=1}^n \alpha_i + p\theta = \sum_{i=1}^n \alpha_i = \sum_{i=1}^s \alpha_i = \sum_{i=1}^s (\mathbf{z}_i - \mathbf{x}_i) = \sum_{i=1}^p (\mathbf{z}_i - \mathbf{x}_i)$ , where we use  $\alpha_i = 0, \forall i \in [s+1, n]$  since  $\mathbf{x}_i = \mathbf{z}_i < t, \forall i \in [s+1, n]$ . Specially,  $\mathbf{x}_i = \mathbf{z}_i, \forall i \in [s+1, p]$ .

Case 3:  $\|\mathbf{z}\|_\infty \leq t$  and  $\|\mathbf{z}\|_1 > pt$ .

(1). If  $\mathbf{x}_j > 0$ , then  $\beta_j = 0$  and  $\mathbf{x}_j = \mathbf{z}_j - \alpha_j - \theta \leq \mathbf{z}_j$ . If  $\alpha_j > 0$ , then  $\mathbf{x}_j < \mathbf{z}_j$  and  $\mathbf{x}_j = t$ , which contradicts with  $\|\mathbf{z}\|_\infty \leq t$ . So  $\alpha_j = 0$  and  $\mathbf{x}_j = \mathbf{z}_j - \theta$ . Moreover,  $\mathbf{z}_j - \theta = \mathbf{x}_j > 0$ .

(2). If  $\mathbf{x}_j = 0$ , then  $\alpha_j = 0$  and  $\mathbf{z}_j - \theta = -\beta_j \leq 0$ .

So  $\mathbf{x}_j = \mathbf{z}_j - \theta$  if  $\mathbf{z}_j - \theta > 0$ ;  $\mathbf{x}_j = 0$  if  $\mathbf{z}_j - \theta \leq 0$ .

If  $\sum_{i=1}^n \mathbf{x}_i < pt$ , then  $\theta = 0$ . From the above analysis we have  $\mathbf{x}_j = \mathbf{z}_j$  if  $\mathbf{z}_j > 0$  and  $\mathbf{x}_j = 0$  if  $\mathbf{z}_j = 0$ . So  $pt > \sum_{i=1}^n \mathbf{x}_i = \sum_{i=1}^n \mathbf{z}_i$ , which contradicts with  $\|\mathbf{z}\|_1 > pt$ . Thus  $\sum_{i=1}^n \mathbf{x}_i = pt$ .

Let  $d = \text{num}(\mathbf{z}_i > \theta)$ . Since  $\mathbf{z}_1 \geq \mathbf{z}_2 \cdots \geq \mathbf{z}_n$ , then  $\mathbf{x}_j = \mathbf{z}_j - \theta$  and  $\mathbf{z}_j - \theta > 0, \forall 1 \leq j \leq d$ ;  $\mathbf{x}_j = 0, \forall j > d$ .

$pt = \sum_{i=1}^n \mathbf{x}_i = \sum_{i=1}^d \mathbf{x}_i = \sum_{i=1}^d (\mathbf{z}_i - \theta) \leq \sum_{i=1}^d \mathbf{z}_i \leq \sum_{i=1}^d t = dt$ , where we use  $\|\mathbf{z}\|_\infty \leq t$ . So  $p \leq d$  and  $\mathbf{x}_j = \mathbf{z}_j - \theta, \forall j \in [1, p]$ . So  $\sum_{i=1}^n \alpha_i + p\theta = p\theta = \sum_{i=1}^p (\mathbf{z}_i - \mathbf{x}_i)$ , where we use  $\alpha_i = 0, \forall i$  from the above analysis.

Case 4:  $\|\mathbf{z}\|_\infty > t$  and  $\|\mathbf{z}\|_1 > pt$ .

(1). If  $\mathbf{x}_j > 0$ , then  $\beta_j = 0$  and  $\mathbf{x}_j = \mathbf{z}_j - \alpha_j - \theta \leq \mathbf{z}_j$ .

Consider case  $\mathbf{z}_j - \theta > t$ . Since  $\mathbf{x}_j \leq t$ , then  $\alpha_j > 0$  and  $\mathbf{x}_j = t$ .

Consider case  $\mathbf{z}_j - \theta = t$ . If  $\mathbf{x}_j < t$ , then from  $\mathbf{x}_j = \mathbf{z}_j - \alpha_j - \theta$  we have  $\alpha_j > 0$ , so  $\mathbf{x}_j = t$ , which contradicts with  $\mathbf{x}_j < t$ . So we have  $\mathbf{x}_j = t$ .

Consider case  $0 < \mathbf{z}_j - \theta < t$ , then  $\mathbf{x}_j = \mathbf{z}_j - \theta - \alpha_j < t$ , so  $\alpha_j = 0$  and  $\mathbf{x}_j = \mathbf{z}_j - \theta$ .

Consider case  $\mathbf{z}_j \leq \theta$ , then  $\mathbf{x}_j = \mathbf{z}_j - \theta - \alpha_j \leq 0$ , which contradicts with the case of  $\mathbf{x}_j > 0$ .

(2). If  $\mathbf{x}_j = 0$ , then  $\alpha_j = 0$  and  $\mathbf{z}_j - \theta = -\beta_j \leq 0$ .

So  $\mathbf{x}_j = t$  for  $\mathbf{z}_j - \theta \geq t$ ,  $\mathbf{x}_j = \mathbf{z}_j - \theta$  for  $0 < \mathbf{z}_j - \theta < t$ ,  $\mathbf{x}_j = 0$  for  $\mathbf{z}_j \leq \theta$ .

Then we consider three subcases in details.

Subcase 1:  $\mathbf{z}_p - \mathbf{z}_{p+1} \geq t$ .

Since  $pt \geq \sum_{i=1}^n \mathbf{x}_i$ ,  $\mathbf{x}_1 \geq \mathbf{x}_2 \geq \cdots \geq \mathbf{x}_n$  and  $\mathbf{x}_j$  can only take  $t$ ,  $\mathbf{z}_j - \theta$  and  $0$ , then the values of  $\mathbf{x}_p$  and  $\mathbf{x}_{p+1}$  have only four cases: (a)  $\mathbf{x}_p = t$  and  $\mathbf{x}_{p+1} = 0$ . (b)  $\mathbf{x}_p = \mathbf{z}_p - \theta$  and  $\mathbf{x}_{p+1} = \mathbf{z}_{p+1} - \theta$ . (c)  $\mathbf{x}_p = \mathbf{z}_p - \theta$  and  $\mathbf{x}_{p+1} = 0$  (d)  $\mathbf{x}_p = 0$  and  $\mathbf{x}_{p+1} = 0$ . The following two cases cannot happen since  $pt \geq \sum_{i=1}^n \mathbf{x}_i$ : (e)  $\mathbf{x}_{p+1} = t$  and (f)  $\mathbf{x}_p = t$ ,  $\mathbf{x}_{p+1} = \mathbf{z}_{p+1} - \theta > 0$ .

For the first case, we have  $\mathbf{z}_p - \theta \geq t$  and  $\mathbf{z}_{p+1} \leq \theta$ , so  $\mathbf{z}_p - \mathbf{z}_{p+1} \geq t$ .

For the second case, we have  $0 < \mathbf{z}_p - \theta < t$  and  $0 < \mathbf{z}_{p+1} - \theta < t$ , so we have  $\mathbf{z}_p - \mathbf{z}_{p+1} < t$ , which contradicts with the assumption.

For the third and fourth case, since  $\mathbf{x}_i \leq t, \forall i$ ,  $\mathbf{x}_p < t$  and  $\mathbf{x}_i = 0, \forall j \geq p+1$ , then  $\sum_{i=1}^n \mathbf{x}_i < pt$  and  $\theta = 0$ . For the third case, we have  $c < \mathbf{z}_p = \mathbf{z}_p - \theta < t$  and  $0 \leq \mathbf{z}_{p+1} \leq \theta = 0$ , which contradicts with  $\mathbf{z}_p - \mathbf{z}_{p+1} \geq t$ . For the fourth case, we have  $0 \leq \mathbf{z}_p \leq \theta = 0$  and  $0 \leq \mathbf{z}_{p+1} \leq \theta = 0$ , which contradicts with the  $\mathbf{z}_p - \mathbf{z}_{p+1} \geq t$ .

So we have  $\mathbf{x}_i = t, \mathbf{z}_i - \theta \geq t, \forall i \in [1, p]$ ,  $\mathbf{x}_i = 0, \mathbf{z}_i \leq \theta, \forall i \in [p+1, n]$ . So  $\alpha_i = 0, \forall i \in [p+1, n]$  and  $\beta_i = 0, \mathbf{x}_i - \mathbf{z}_i + \alpha_i + \theta = 0, \forall i \in [1, p]$ . So  $\sum_{i=1}^n \alpha_i + p\theta = \sum_{i=1}^p (\alpha_i + \theta) = \sum_{i=1}^p (\mathbf{z}_i - \mathbf{x}_i)$ .

Subcase 2:  $\mathbf{z}_p - \mathbf{z}_{p+1} < t$  and  $st + \sum_{\mathbf{z}_i < t} \mathbf{z}_i \leq pt$ .

From  $st + \sum_{\mathbf{z}_i < t} \mathbf{z}_i \leq pt$  we know  $s \leq p$ . If  $s = p$ , then there exists no  $\mathbf{z}_i$  such that  $0 < \mathbf{z}_i < t$ . Since  $\mathbf{z}_s \geq t$  and  $\mathbf{z}_{s+1} < t$  from the definition of  $s$ , then  $\mathbf{z}_{s+1} = 0$ . So  $\mathbf{z}_p \geq t$  and  $\mathbf{z}_{p+1} = 0$ , which contradicts with  $\mathbf{z}_p - \mathbf{z}_{p+1} < t$ . So  $s < p$ .

If  $\theta > 0$ , then  $\sum_{i=1}^n \mathbf{x}_i = pt$ . Since  $\mathbf{x}_i \leq \mathbf{z}_i$  and  $\mathbf{x}_i \leq t$ , then  $pt \geq st + \sum_{\mathbf{z}_i < t} \mathbf{z}_i = st + \sum_{i=s+1}^n \mathbf{z}_i \geq \sum_{i=1}^s \mathbf{x}_i + \sum_{i=s+1}^n \mathbf{x}_i = \sum_{i=1}^n \mathbf{x}_i = pt$ . So the equalities hold and  $st + \sum_{\mathbf{z}_i < t} \mathbf{z}_i = pt$ ,  $\mathbf{x}_i = t, \forall i \leq s$ ,  $\mathbf{x}_i = \mathbf{z}_i, \forall i > s$ . Since  $s < p$  and  $pt = \sum_{i=1}^n \mathbf{x}_i = st + \sum_{i=s+1}^n \mathbf{z}_i$ , then  $\mathbf{z}_{s+1} > 0$ . So  $\mathbf{x}_{s+1} = \mathbf{z}_{s+1} \in (0, t)$ , then  $\alpha_{s+1} = 0$  and  $\beta_{s+1} = 0$ . So  $\theta = 0$  from (8), which contradicts with the assumption  $\theta > 0$ . So  $\theta = 0$ . Then  $\mathbf{x}_i = t$  for  $\mathbf{z}_i \geq t$ ,  $\mathbf{x}_i = \mathbf{z}_i$  for  $\mathbf{z}_i < t$ . That is,  $\mathbf{x}_i = t, \forall i \in [1, s]$ ,  $\mathbf{x}_i = \mathbf{z}_i < t, \forall i \in [s+1, n]$ .

Since  $\alpha_i = 0, \forall i \in [s+1, n], \beta_i = 0, \mathbf{x}_i - \mathbf{z}_i + \alpha_i = 0, \forall i \in [1, s], p > s$  and  $\mathbf{x}_i = \mathbf{z}_i, \forall i \in [s+1, n]$ , then  $\sum_{i=1}^n \alpha_i + p\theta = \sum_{i=1}^s \alpha_i = \sum_{i=1}^s (\mathbf{z}_i - \mathbf{x}_i) = \sum_{i=1}^p (\mathbf{z}_i - \mathbf{x}_i)$ .

Subcase 3:  $\mathbf{z}_p - \mathbf{z}_{p+1} < t$  and  $st + \sum_{\mathbf{z}_i < t} \mathbf{z}_i > pt$ .

If  $\theta = 0$ , then  $\mathbf{x}_i = t$  if  $\mathbf{z}_i \geq t, \mathbf{x}_i = \mathbf{z}_i$  if  $0 < \mathbf{z}_i < t, \mathbf{x}_i = 0$  if  $\mathbf{z}_i = 0$ . So  $pt \geq \sum_{i=1}^n \mathbf{x}_i = st + \sum_{\mathbf{z}_i < t} \mathbf{z}_i$ , which contradicts with the assumption. So  $\theta > 0$  and  $pt = \sum_{i=1}^n \mathbf{x}_i = \text{num}(\mathbf{z}_i - \theta \geq t) \times t + \sum_{0 < \mathbf{z}_i - \theta < t} (\mathbf{z}_i - \theta)$ .

Let  $d = \text{num}(\mathbf{x}_i > 0) = \text{num}(\mathbf{z}_i > \theta)$  and  $r = \text{num}(\mathbf{z}_i - \theta \geq t)$ . Then  $\mathbf{x}_i = t, \mathbf{z}_i - \theta \geq t, \forall i \leq r; \mathbf{x}_i = \mathbf{z}_i - \theta, 0 < \mathbf{z}_i - \theta < t, \forall r < i \leq d; \mathbf{x}_i = 0, \mathbf{z}_i \leq \theta, \forall i > d$ . Notice that in this case  $r$  can be 0,  $d$  can be  $n$ .

If  $r = d$ , then  $\mathbf{x}_r = t$  and  $\mathbf{x}_{r+1} = 0$ . Since  $pt = \sum_{i=1}^n \mathbf{x}_i$ , then  $p = r, \mathbf{x}_p = t$  and  $\mathbf{x}_{p+1} = 0$ . So  $\mathbf{z}_p - \theta \geq t$  and  $\mathbf{z}_{p+1} \leq \theta$ . So  $\mathbf{z}_p - \mathbf{z}_{p+1} \geq t$ , which contradicts with the assumption. So  $r < d$ .

Since  $rt < rt + \sum_{i=r+1}^d (\mathbf{z}_i - \theta) < rt + \sum_{i=r+1}^d t = dt$ , then  $r < p < d$ .

Since  $\alpha_i = 0, \forall i \in [r+1, n]$  and  $\beta_i = 0, \forall i \in [1, d]$ , then  $\sum_{i=1}^n \alpha_i + p\theta = \sum_{i=1}^r \alpha_i + p\theta = \sum_{i=1}^r (\mathbf{z}_i - \mathbf{x}_i - \theta) + p\theta = \sum_{i=1}^r (\mathbf{z}_i - \mathbf{x}_i) + (p-r)\theta = \sum_{i=1}^r (\mathbf{z}_i - \mathbf{x}_i) + \sum_{r+1}^p \theta = \sum_{i=1}^r (\mathbf{z}_i - \mathbf{x}_i) + \sum_{r+1}^p (\mathbf{z}_i - \mathbf{x}_i) = \sum_{i=1}^p (\mathbf{z}_i - \mathbf{x}_i)$ , where we use  $p < d$  and  $\mathbf{x}_i = \mathbf{z}_i - \theta$  for  $i \in [r+1, p]$ . ■

**Lemma 5** In case 3, let  $h(\theta) = \sum_{\mathbf{z}_i > \theta} (\mathbf{z}_i - \theta), \theta \in [0, \mathbf{z}_1], \mathbf{z}_{n+1} = 0$  then

$$h(\theta) = \sum_{i=1}^k \mathbf{z}_i - k\theta, \quad \theta \in [\mathbf{z}_{k+1}, \mathbf{z}_k], \forall k = n, \dots, 1.$$

and  $h(\theta) \in (0, \|\mathbf{z}\|_1]$  is continuous, piecewise linear and strictly decreasing. Thus there is a unique solution for  $h(\theta) = pt$ .

**Proof** Since  $\mathbf{z}_1 \geq \mathbf{z}_2 \geq \dots \geq \mathbf{z}_n$ , then  $h(\theta) = \sum_{\mathbf{z}_i > \theta} (\mathbf{z}_i - \theta) = \sum_{i=1}^k (\mathbf{z}_i - \theta)$  if  $\theta \in [\mathbf{z}_{k+1}, \mathbf{z}_k]$ . So  $\lim_{\theta \rightarrow \mathbf{z}_k^+} h(\theta) = \sum_{i=1}^k (\mathbf{z}_i - \mathbf{z}_k) = \sum_{i=1}^{k-1} (\mathbf{z}_i - \mathbf{z}_k) = h(\mathbf{z}_k)$ . Thus  $h(\theta) \in (0, \|\mathbf{z}\|_1]$  is continuous, piecewise linear and strictly decreasing. ■

**Lemma 6** Let  $d+k = \max\{i : \mathbf{z}_i = \mathbf{z}_{d+1}\}, r+j = \max\{i : \mathbf{z}_i = \mathbf{z}_{r+1}\}, k^* = \max\{i : \mathbf{z}_i = \mathbf{z}_1\}, \mathbf{z}_{n+1} = 0, \mathbf{z}_0 = \infty$ . Define interval

$$S(r, d) = (\max\{\mathbf{z}_{d+1}, \mathbf{z}_{r+1} - t\}, \min\{\mathbf{z}_d, \mathbf{z}_r - t\}].$$

Go left from nonempty  $S(0, k^*) = (\max\{\mathbf{z}_{k^*+1}, \mathbf{z}_1 - t\}, \mathbf{z}_1]$  and end when  $S(r, d)$  reaches 0. For nonempty  $S(r, d)$ ,

1. If  $\mathbf{z}_{d+1} < \mathbf{z}_{r+1} - t < \min\{\mathbf{z}_d, \mathbf{z}_r - t\}$ , then  $S(r+j, d)$  is on the left hand side of  $S(r, d)$  and  $S(r+j, d)$  is nonempty.
2. If  $\mathbf{z}_{r+1} - t < \mathbf{z}_{d+1} < \min\{\mathbf{z}_d, \mathbf{z}_r - t\}$ , then  $S(r, d+k)$  is on the left hand side of  $S(r, d)$  and  $S(r, d+k)$  is nonempty.



3. If  $\mathbf{z}_{r+1} - t = \mathbf{z}_{d+1} < \min\{\mathbf{z}_d, \mathbf{z}_r - t\}$ , then  $S(r + j, d + k)$  is on the left hand side of  $S(r, d)$  and  $S(r + j, d + k)$  is nonempty.

The union of the constructed disjoint intervals is  $[0, \mathbf{z}_1]$ .

**Proof**  $S(r, d)$  is nonempty, so we can consider three cases:

If  $\mathbf{z}_{d+1} < \mathbf{z}_{r+1} - t < \min\{\mathbf{z}_d, \mathbf{z}_r - t\}$ , then  $S(r, d) = (\mathbf{z}_{r+1} - t, \min\{\mathbf{z}_d, \mathbf{z}_r - t\}]$ ,

$$\begin{aligned} S(r + j, d) &= (\max\{\mathbf{z}_{d+1}, \mathbf{z}_{r+j+1} - t\}, \min\{\mathbf{z}_d, \mathbf{z}_{r+j} - t\}] \\ &= (\max\{\mathbf{z}_{d+1}, \mathbf{z}_{r+j+1} - t\}, \min\{\mathbf{z}_d, \mathbf{z}_{r+1} - t\}] \\ &= (\max\{\mathbf{z}_{d+1}, \mathbf{z}_{r+j+1} - t\}, \mathbf{z}_{r+1} - t], \end{aligned}$$

and  $S(r + j, d)$  is nonempty from the definition of  $r + j$ .

If  $\mathbf{z}_{r+1} - t < \mathbf{z}_{d+1} < \min\{\mathbf{z}_d, \mathbf{z}_r - t\}$ , then  $S(r, d) = (\mathbf{z}_{d+1}, \min\{\mathbf{z}_d, \mathbf{z}_r - t\}]$ ,

$$\begin{aligned} S(r, d + k) &= (\max\{\mathbf{z}_{d+k+1}, \mathbf{z}_{r+1} - t\}, \min\{\mathbf{z}_{d+k}, \mathbf{z}_r - t\}] \\ &= (\max\{\mathbf{z}_{d+k+1}, \mathbf{z}_{r+1} - t\}, \min\{\mathbf{z}_{d+1}, \mathbf{z}_r - t\}] \\ &= (\max\{\mathbf{z}_{d+k+1}, \mathbf{z}_{r+1} - t\}, \mathbf{z}_{d+1}], \end{aligned}$$

and  $S(r, d + k)$  is nonempty from the definition of  $d + k$ .

If  $\mathbf{z}_{r+1} - t = \mathbf{z}_{d+1} < \min\{\mathbf{z}_d, \mathbf{z}_r - t\}$ , then  $S(r, d) = (\mathbf{z}_{r+1} - t, \min\{\mathbf{z}_d, \mathbf{z}_r - t\}] = (\mathbf{z}_{d+1}, \min\{\mathbf{z}_d, \mathbf{z}_r - t\}]$ ,

$$\begin{aligned} S(r + j, d + k) &= (\max\{\mathbf{z}_{d+k+1}, \mathbf{z}_{r+j+1} - t\}, \min\{\mathbf{z}_{d+k}, \mathbf{z}_{r+j} - t\}] \\ &= (\max\{\mathbf{z}_{d+k+1}, \mathbf{z}_{r+j+1} - t\}, \min\{\mathbf{z}_{d+1}, \mathbf{z}_{r+1} - t\}] \\ &= (\max\{\mathbf{z}_{d+k+1}, \mathbf{z}_{r+j+1} - t\}, \mathbf{z}_{r+1} - t] \\ &= (\max\{\mathbf{z}_{d+k+1}, \mathbf{z}_{r+j+1} - t\}, \mathbf{z}_{d+1}], \end{aligned}$$

and  $S(r + j, d + k)$  is nonempty.

As  $\mathbf{z}_{n+1} = 0$ , so  $S(r, d)$  can reach 0. ■

**Lemma 7** In case 4.3, let  $\mathbf{z}_{n+1} = 0$ ,  $\mathbf{z}_{n+2} < 0$ ,  $\mathbf{z}_0 = \infty$ ,  $h(\theta) = \text{num}(\mathbf{z}_i - \theta \geq t) \times t + \sum_{0 < \mathbf{z}_i - \theta < t} (\mathbf{z}_i - \theta)$ . Consider  $S(r, d)$  constructed in Lemma 6, then

$$h(\theta) = rt + \sum_{i=r+1}^d \mathbf{z}_i - (d - r)\theta, \quad \theta \in S(r, d).$$

$h(\theta), \theta \in [0, \mathbf{z}_1]$  is continuous, piecewise linear, non-increasing and there is a unique solution for  $h(\theta) = pt$ .

**Proof**

$\theta \in S(r, d) \Rightarrow \theta \in (\mathbf{z}_{d+1}, \mathbf{z}_d], \theta \in (\mathbf{z}_{r+1} - t, \mathbf{z}_r - t]$ , so

$$\begin{aligned} h(\theta) &= \text{num}(\mathbf{z}_i - \theta \geq t) \times t + \sum_{0 < \mathbf{z}_i - \theta < t} (\mathbf{z}_i - \theta) \\ &= \text{num}(\mathbf{z}_i - \theta \geq t) \times t + \sum_{0 \leq \mathbf{z}_i - \theta < t} (\mathbf{z}_i - \theta) \\ &= rt + \sum_{i=r+1}^d (\mathbf{z}_i - \theta) = rt + \sum_{i=r+1}^d \mathbf{z}_i - (d-r)\theta. \end{aligned}$$

Since  $S$  is nonempty, then  $\mathbf{z}_{d+1} \leq \mathbf{z}_r - t < \mathbf{z}_r \Rightarrow r \leq d$ . Thus  $h(\theta), \theta \in S(r, d)$  is a linear strictly decreasing function if  $d > r$  and the constant  $rt$  if  $r = d$ .

Now we prove that  $h(\theta)$  is continuous when  $\theta \in [0, \mathbf{z}_1]$ .

If  $\mathbf{z}_{d+1} < \mathbf{z}_{r+1} - t < \min\{\mathbf{z}_d, \mathbf{z}_r - t\}$ , then  $S(r, d) = (\mathbf{z}_{r+1} - t, \min\{\mathbf{z}_d, \mathbf{z}_r - t\}]$  and  $S(r+j, d) = (\max\{\mathbf{z}_{d+1}, \mathbf{z}_{r+j+1} - t\}, \mathbf{z}_{r+1} - t]$  is on the left hand side of  $S(r, d)$ .

$$\begin{aligned} \lim_{\theta \rightarrow \mathbf{z}_{r+1} - t} h(\theta) &= rt + \sum_{i=r+1}^d (\mathbf{z}_i - (\mathbf{z}_{r+1} - t)) \\ &= (r+j)t + \sum_{i=r+j+1}^d (\mathbf{z}_i - (\mathbf{z}_{r+1} - t)) - jt + \sum_{i=r+1}^{r+j} (\mathbf{z}_i - (\mathbf{z}_{r+1} - t)) \\ &= (r+j)t + \sum_{i=r+j+1}^d (\mathbf{z}_i - (\mathbf{z}_{r+1} - t)) = h(\mathbf{z}_{r+1} - t). \end{aligned}$$

where  $\mathbf{z}_i = \mathbf{z}_{r+1}, \forall i \in [r+1, r+j]$  from the definition of  $r+j$ .

If  $\mathbf{z}_{r+1} - t < \mathbf{z}_{d+1} < \min\{\mathbf{z}_d, \mathbf{z}_r - t\}$ , then  $S(r, d) = (\mathbf{z}_{d+1}, \min\{\mathbf{z}_d, \mathbf{z}_r - t\}]$  and  $S(r, d+k) = (\max\{\mathbf{z}_{d+k+1}, \mathbf{z}_{r+1} - t\}, \mathbf{z}_{d+1}]$  is on the left hand side of  $S(r, d)$ .

$$\begin{aligned} \lim_{\theta \rightarrow \mathbf{z}_{d+1}} h(\theta) &= rt + \sum_{i=r+1}^d (\mathbf{z}_i - \mathbf{z}_{d+1}) = rt + \sum_{i=r+1}^{d+k} (\mathbf{z}_i - \mathbf{z}_{d+1}) - \sum_{i=d+1}^{d+k} (\mathbf{z}_i - \mathbf{z}_{d+1}) \\ &= rt + \sum_{i=r+1}^{d+k} (\mathbf{z}_i - \mathbf{z}_{d+1}) = h(\mathbf{z}_{d+1}). \end{aligned}$$

where  $\mathbf{z}_i = \mathbf{z}_{d+1}, \forall i \in [d+1, d+k]$  from the definition of  $d+k$ .

If  $\mathbf{z}_{r+1} - t = \mathbf{z}_{d+1} < \min\{\mathbf{z}_d, \mathbf{z}_r - t\}$ , then  $S(r, d) = (\mathbf{z}_{r+1} - t, \min\{\mathbf{z}_d, \mathbf{z}_r - t\}] = (\mathbf{z}_{d+1}, \min\{\mathbf{z}_d, \mathbf{z}_r - t\}]$  and  $S(r+j, d+k) = (\max\{\mathbf{z}_{d+k+1}, \mathbf{z}_{r+j+1} - t\}, \mathbf{z}_{r+1} - t] = (\max\{\mathbf{z}_{d+k+1}, \mathbf{z}_{r+j+1} -$

$t\}, \mathbf{z}_{d+1}]$  is on the left hand side of  $S(r, d)$ .

$$\begin{aligned}
 \lim_{\theta \rightarrow \mathbf{z}_{r+1}-t} h(\theta) &= \lim_{\theta \rightarrow \mathbf{z}_{d+1}} h(\theta) = rt + \sum_{i=r+1}^d (\mathbf{z}_i - \mathbf{z}_{d+1}) \\
 &= (r+j)t + \sum_{i=r+j+1}^{d+k} (\mathbf{z}_i - \mathbf{z}_{d+1}) - \sum_{i=d+1}^{d+k} (\mathbf{z}_i - \mathbf{z}_{d+1}) - jt + \sum_{i=r+1}^{r+j} (\mathbf{z}_i - \mathbf{z}_{d+1}) \\
 &= (r+j)t + \sum_{i=r+j+1}^{d+k} (\mathbf{z}_i - \mathbf{z}_{d+1}) - \sum_{i=d+1}^{d+k} (\mathbf{z}_i - \mathbf{z}_{d+1}) - jt + \sum_{i=r+1}^{r+j} (\mathbf{z}_i - \mathbf{z}_{r+1} + t) \\
 &= (r+j)t + \sum_{i=r+j+1}^{d+k} (\mathbf{z}_i - \mathbf{z}_{d+1}) = h(\mathbf{z}_{d+1}).
 \end{aligned}$$

Thus  $h(\theta)$  is continuous when  $\theta \in [0, \mathbf{z}_1]$ .

Now we claim that if  $h(\theta)$  is a constant at some interval, then  $h(\theta) = rt \neq pt$ . Otherwise,  $r = p = d$ . Since  $S$  is nonempty, then  $\mathbf{z}_{p+1} \leq \mathbf{z}_p - t$ , which contradicts with the assumption  $\mathbf{z}_p - \mathbf{z}_{p+1} < t$ .

From  $0 \in S(r, d) \Rightarrow \mathbf{z}_{d+1} < 0 \leq \mathbf{z}_d, \mathbf{z}_{r+1} - t < 0 \leq \mathbf{z}_r - t$ , we have  $r = s \equiv \text{num}(\mathbf{z}_i \geq t)$  and  $d = n + 1$ . So  $h(0) = st + \sum_{\mathbf{z}_i < t} \mathbf{z}_i$ . From  $\mathbf{z}_1 \in S(r, d) \Rightarrow \mathbf{z}_{d+1} < \mathbf{z}_1 \leq \mathbf{z}_d, \mathbf{z}_{r+1} - t < \mathbf{z}_1 \leq \mathbf{z}_r - t$ , we have  $d = k^* = \max\{i : \mathbf{z}_i = \mathbf{z}_1\}$  and  $r = 0$ . So  $h(\mathbf{z}_1) = \sum_{i=1}^{k^*} (\mathbf{z}_i - \mathbf{z}_1) = 0$ . Thus  $h(\theta) \in [0, st + \sum_{\mathbf{z}_i < t} \mathbf{z}_i]$ . Since  $st + \sum_{\mathbf{z}_i < t} \mathbf{z}_i > pt$ , then there is a unique solution for  $h(\theta) = pt$ .  $\blacksquare$

#### 4. Proof in Section 5

The Lagrangian function is:

$$\begin{aligned}
 L(\mathbf{X}, \mathbf{g}, \alpha, \theta, \beta, \lambda) &= \frac{1}{2} \sum_{i,j} |\mathbf{z}_{i,j} - \mathbf{X}_{i,j}|^2 + \sum_{i,j} \langle \alpha_{i,j}, \mathbf{X}_{i,j} - \mathbf{g}_i \rangle \\
 &+ \sum_{i=1}^n \left\langle \theta_i, \sum_{j=1}^n \mathbf{X}_{i,j} - p\mathbf{g}_i \right\rangle + \left\langle \lambda, \sum_{i=1}^n \mathbf{g}_i - T \right\rangle - \sum_{i,j} \langle \beta_{i,j}, \mathbf{X}_{i,j} \rangle.
 \end{aligned}$$

and its KKT conditions are:

$$\mathbf{X}_{i,j} - \mathbf{Z}_{i,j} + \alpha_{i,j} - \beta_{i,j} + \theta_i = 0, \quad (12)$$

$$-\sum_j \alpha_{i,j} - p\theta_i + \lambda = 0, \quad (13)$$

$$\sum_{i=1}^n \mathbf{g}_i = T, \quad (14)$$

$$\mathbf{X}_{i,j} \leq \mathbf{g}_i, \quad \alpha_{i,j} \geq 0, \quad \langle \alpha_{i,j}, \mathbf{X}_{i,j} - \mathbf{g}_i \rangle = 0, \quad (15)$$

$$\theta_i \geq 0, \quad \sum_{j=1}^n \mathbf{X}_{i,j} \leq p\mathbf{g}_i, \quad \left\langle \theta_i, \sum_{j=1}^n \mathbf{X}_{i,j} - p\mathbf{g}_i \right\rangle = 0, \quad (16)$$

$$\mathbf{X}_{i,j} \geq 0, \quad \beta_{i,j} \geq 0, \quad \langle \beta_{i,j}, \mathbf{X}_{i,j} \rangle = 0. \quad (17)$$

**Lemma 8** *At the optimal solution, either (1)  $\mathbf{g}_i > 0$  and  $\sum_{j=1}^p (\mathbf{Z}_{i,j} - \mathbf{X}_{i,j}) = \lambda$ ; or (2)  $\mathbf{g}_i = 0$  and  $\sum_{j=1}^p \mathbf{Z}_{i,j} \leq \lambda$ .*

**Proof** If  $\mathbf{g}_i = 0$ , then  $\mathbf{X}_{i,j} = 0, \forall j$ , so  $\alpha_{i,j} + \theta_i = \mathbf{Z}_{i,j} + \beta_{i,j} \geq \mathbf{Z}_{i,j}$ .

$$\lambda = \sum_{j=1}^n \alpha_{i,j} + p\theta_i \geq \sum_{j=1}^p \alpha_{i,j} + p\theta_i = \sum_{j=1}^p (\alpha_{i,j} + \theta_i) \geq \sum_{j=1}^p \mathbf{Z}_{i,j}.$$

If  $\mathbf{g}_i > 0$ . Consider (12), (15), (16) and (17), the four conditions are equivalent to minimizing the following problem with fixed  $\mathbf{g}_i$ :

$$\begin{aligned} & \min_{\mathbf{X}_i} \frac{1}{2} \sum_j |\mathbf{Z}_{i,j} - \mathbf{X}_{i,j}|^2 \\ & \text{s.t. } \mathbf{X}_{i,j} \leq \mathbf{g}_i, \forall j, \quad \frac{1}{p} \sum_{j=1}^n \mathbf{X}_{i,j} \leq \mathbf{g}_i, \quad \mathbf{X}_{i,j} \geq 0, \forall j. \end{aligned} \quad (18)$$

From Theorem 4, we have  $\sum_{j=1}^n \alpha_{i,j} + p\theta_i = \sum_{j=1}^p (\mathbf{Z}_{i,j} - \mathbf{X}_{i,j})$ . So from (13) we have  $\lambda = \sum_{j=1}^p (\mathbf{Z}_{i,j} - \mathbf{X}_{i,j})$ .  $\blacksquare$

**Lemma 9** *Let  $s = \text{num}(\mathbf{z}_i \geq t)$ ,  $r = \text{num}(\mathbf{z}_i - \theta \geq t)$  and  $d = \text{num}(\mathbf{z}_i > \theta)$  in case 4.3 of Theorem 4.*

*If  $\|\mathbf{z}\|_\infty \geq \frac{1}{p}\|\mathbf{z}\|_1$ , then*

$$g(t) = \begin{cases} 0, & t \geq \|\mathbf{z}\|_\infty \\ \sum_{i=1}^s \mathbf{z}_i - st, & t^* \leq t < \|\mathbf{z}\|_\infty \\ \sum_{i=1}^r \mathbf{z}_i - rt + (p-r)\theta, & \mathbf{z}_p - \mathbf{z}_{p+1} < t < t^* \\ \sum_{i=1}^p \mathbf{z}_i - pt, & t \leq \mathbf{z}_p - \mathbf{z}_{p+1} \end{cases}$$

where  $t^* \in [\mathbf{z}_p - \mathbf{z}_{p+1}, \|\mathbf{z}\|_1/p]$  is the unique solution satisfying  $\text{num}(\mathbf{z}_i \geq t) + \frac{\sum_{\mathbf{z}_i < t} \mathbf{z}_i}{t} = p$ .

If  $\|\mathbf{z}\|_\infty < \frac{1}{p}\|\mathbf{z}\|_1$ , then

$$g(t) = \begin{cases} 0, & t \geq \frac{1}{p}\|\mathbf{z}\|_1 \\ p\theta, & \|\mathbf{z}\|_\infty \leq t < \frac{1}{p}\|\mathbf{z}\|_1 \\ \sum_{i=1}^r \mathbf{z}_i - rt + (p-r)\theta, & \mathbf{z}_p - \mathbf{z}_{p+1} < t < \|\mathbf{z}\|_\infty \\ \sum_{i=1}^p \mathbf{z}_i - pt, & t \leq \mathbf{z}_p - \mathbf{z}_{p+1} \end{cases}$$

**Proof** Similar to Theorem 4, we consider four cases.

(1). If  $t \geq \|\mathbf{z}\|_\infty$  and  $t \geq \frac{1}{p}\|\mathbf{z}\|_1$ , then  $\mathbf{z} = \mathbf{x}$  and  $g(t) = 0$ .

(2). If  $t < \|\mathbf{z}\|_\infty$  and  $t \geq \frac{1}{p}\|\mathbf{z}\|_1$ , then  $\mathbf{x}_i = t, \forall i \leq s$ ,  $\mathbf{x}_i = \mathbf{z}_i, \forall i > s$ , and  $p > s$ . So  $g(t) = \sum_{i=1}^s \mathbf{z}_i - st$ .

(3). If  $t \geq \|\mathbf{z}\|_\infty$  and  $t < \frac{1}{p}\|\mathbf{z}\|_1$ , then  $\mathbf{x}_i = \mathbf{z}_i - \theta$  if  $\mathbf{z}_i - \theta > 0$ ,  $\mathbf{x}_i = 0$  if  $\mathbf{z}_i - \theta \leq 0$ , And  $p \leq \text{num}(\mathbf{z}_i > \theta)$ . So  $g(t) = p\theta$ .

(4). If  $t < \|\mathbf{z}\|_\infty$  and  $t < \frac{1}{p}\|\mathbf{z}\|_1$ , consider three cases:

(4a). If  $\mathbf{z}_p - \mathbf{z}_{p+1} \geq t$ , then  $\mathbf{x}_i = t, \forall i \in [1, p]$ ,  $\mathbf{x}_i = 0, \forall i \in [p+1, n]$ . So  $g(t) = \sum_{i=1}^p \mathbf{z}_i - pt$ .

(4b). If  $\mathbf{z}_p - \mathbf{z}_{p+1} < t$  and  $st + \sum_{\mathbf{z}_i < t} \mathbf{z}_i \leq pt$ , then  $\mathbf{x}_i = t, \forall i \leq s$ ,  $\mathbf{x}_i = \mathbf{z}_i, \forall i > s$ ,  $p \geq s$ . So  $g(t) = \sum_{i=1}^s \mathbf{z}_i - st$ .

(4c). If  $\mathbf{z}_p - \mathbf{z}_{p+1} < t$  and  $st + \sum_{\mathbf{z}_i < t} \mathbf{z}_i > pt$ , then  $\mathbf{x}_i = t, \forall i \leq r$ ,  $\mathbf{x}_i = \mathbf{z}_i - \theta, \forall r < i \leq d$ ,  $\mathbf{x}_i = 0, \forall i > d$ ,  $r < p < d$ . So  $g(t) = \sum_{i=1}^r \mathbf{z}_i - rt + (p-r)\theta$ .

Let  $h(t) = \text{num}(\mathbf{z}_i \geq t) + \frac{\sum_{\mathbf{z}_i < t} \mathbf{z}_i}{t} = s + \frac{\sum_{i=s+1}^n \mathbf{z}_i}{t}$ . Recall that  $\mathbf{z}_s \geq t$  and  $\mathbf{z}_{s+1} < t$ . Increase  $t$  satisfying  $\mathbf{z}_s \geq t$ , then  $\text{num}(\mathbf{z}_i \geq t)$  and  $\sum_{\mathbf{z}_i < t} \mathbf{z}_i$  do not change, so  $h(t)$  strictly decrease. Further increase  $t$  to  $t'$  satisfying  $\mathbf{z}_s < t'$  and  $t' \leq \mathbf{z}_{s-j}$ , where we allow repetition to consider  $\mathbf{z}_s = \mathbf{z}_{s-1} = \dots = \mathbf{z}_{s-j+1} < \mathbf{z}_{s-j}$ . Then  $h(t') = s - j + \frac{\sum_{i=s-j+1}^n \mathbf{z}_i}{t'} = s - j + \frac{\sum_{i=s+1}^n \mathbf{z}_i + \sum_{i=s-j+1}^s \mathbf{z}_i}{t'} = s + \frac{\sum_{i=s+1}^n \mathbf{z}_i}{t'} + \frac{j\mathbf{z}_s}{t'} - j < s + \frac{\sum_{i=s+1}^n \mathbf{z}_i}{t'} < s + \frac{\sum_{i=s+1}^n \mathbf{z}_i}{t} = h(t)$ . So  $h(t)$  is strictly decreasing. We also have  $h(\mathbf{z}_n) = n$  and  $h(\mathbf{z}_1) = \text{num}(\mathbf{z}_i = \mathbf{z}_1) + \frac{\|\mathbf{z}\|_1 - \text{num}(\mathbf{z}_i = \mathbf{z}_1) \times \mathbf{z}_1}{\mathbf{z}_1} = \frac{\|\mathbf{z}\|_1}{\mathbf{z}_1} = \frac{\|\mathbf{z}\|_1}{\|\mathbf{z}\|_\infty}$ . So if  $\|\mathbf{z}\|_\infty \geq \frac{1}{p}\|\mathbf{z}\|_1$ , then  $p \in [h(\mathbf{z}_1), h(\mathbf{z}_n)]$  and there exists a unique  $t^* \in [\mathbf{z}_n, \mathbf{z}_1]$  such that  $h(t^*) = p$ . If  $\|\mathbf{z}\|_\infty < \frac{1}{p}\|\mathbf{z}\|_1$ , then  $h(t) \geq h(\mathbf{z}_1) > p, \forall t \leq \mathbf{z}_1 = \|\mathbf{z}\|_\infty$ . So  $st + \sum_{\mathbf{z}_i < t} \mathbf{z}_i > pt$  and case (4b) in the above analysis dose not hold.

We first consider the case of  $\|\mathbf{z}\|_\infty < \frac{1}{p}\|\mathbf{z}\|_1$ :

(1). If  $t \geq \frac{1}{p}\|\mathbf{z}\|_1$ , then  $g(t) = 0$ .

(2). If  $\|\mathbf{z}\|_\infty \leq t < \frac{1}{p}\|\mathbf{z}\|_1$ , then  $g(t) = p\theta$ .

(3). If  $\mathbf{z}_p - \mathbf{z}_{p+1} < t < \|\mathbf{z}\|_\infty$ , then  $g(t) = \sum_{i=1}^r \mathbf{z}_i - rt + (p-r)\theta$ .

(4). If  $t \leq \mathbf{z}_p - \mathbf{z}_{p+1}$ , then  $g(t) = \sum_{i=1}^p \mathbf{z}_i - pt$ .

We then consider the case of  $\|\mathbf{z}\|_\infty \geq \frac{1}{p}\|\mathbf{z}\|_1$ .

Let  $v = \text{num}(\mathbf{z}_i \geq \|\mathbf{z}\|_1/p)$ , then  $\mathbf{z}_v \geq \|\mathbf{z}\|_1/p$ ,  $\mathbf{z}_{v+1} < \|\mathbf{z}\|_1/p$  and  $h(\|\mathbf{z}\|_1/p) = v + p \sum_{i=v+1}^n \mathbf{z}_i / \|\mathbf{z}\|_1 = v + p(\|\mathbf{z}\|_1 - \sum_{i=1}^v \mathbf{z}_i) / \|\mathbf{z}\|_1 = v + p - p \sum_{i=1}^v \mathbf{z}_i / \|\mathbf{z}\|_1 \leq v + p - pv\mathbf{z}_v / \|\mathbf{z}\|_1 \leq p$ . So  $\|\mathbf{z}\|_1/p \geq t^*$ .

If  $\mathbf{z}_{p+1} > 0$ , then  $h(\mathbf{z}_p - \mathbf{z}_{p+1}) = \text{num}(\mathbf{z}_i \geq \mathbf{z}_p - \mathbf{z}_{p+1}) + \frac{\sum_{\mathbf{z}_i < \mathbf{z}_p - \mathbf{z}_{p+1}} \mathbf{z}_i}{\mathbf{z}_p - \mathbf{z}_{p+1}}$ . If  $\mathbf{z}_{p+1} \geq \mathbf{z}_p - \mathbf{z}_{p+1}$ , then  $h(\mathbf{z}_p - \mathbf{z}_{p+1}) \geq \text{num}(\mathbf{z}_i \geq \mathbf{z}_p - \mathbf{z}_{p+1}) \geq p + 1$ . If  $\mathbf{z}_{p+1} < \mathbf{z}_p - \mathbf{z}_{p+1}$ , since  $\mathbf{z}_p > \mathbf{z}_p - \mathbf{z}_{p+1}$ , then  $h(\mathbf{z}_p - \mathbf{z}_{p+1}) = p + \frac{\sum_{\mathbf{z}_i < \mathbf{z}_p - \mathbf{z}_{p+1}} \mathbf{z}_i}{\mathbf{z}_p - \mathbf{z}_{p+1}} \geq p + \frac{\mathbf{z}_{p+1}}{\mathbf{z}_p - \mathbf{z}_{p+1}} > p$ . So  $h(\mathbf{z}_p - \mathbf{z}_{p+1}) > p$  and

$\mathbf{z}_p - \mathbf{z}_{p+1} < t^*$ . If  $\mathbf{z}_{p+1} = 0$ , then  $h(\mathbf{z}_p - \mathbf{z}_{p+1}) = h(\mathbf{z}_p) = \text{num}(\mathbf{z}_i \geq \mathbf{z}_p) + \frac{\sum_{\mathbf{z}_i < \mathbf{z}_p} \mathbf{z}_i}{\mathbf{z}_p} = p$ . So  $t^* = \mathbf{z}_p = \mathbf{z}_p - \mathbf{z}_{p+1}$ .

Thus  $\mathbf{z}_p - \mathbf{z}_{p+1} \leq t^* \leq \|\mathbf{z}\|_1/p$  and we have

- (1). If  $t \geq \|\mathbf{z}\|_\infty$ , then  $g(t) = 0$ .
- (2). If  $\frac{1}{p}\|\mathbf{z}\|_1 \leq t < \|\mathbf{z}\|_\infty$ , then  $g(t) = \sum_{i=1}^s \mathbf{z}_i - st$ .
- (3). If  $t^* \leq t < \frac{1}{p}\|\mathbf{z}\|_1$ , then  $g(t) = \sum_{i=1}^s \mathbf{z}_i - st$ .
- (4). If  $\mathbf{z}_p - \mathbf{z}_{p+1} < t < t^*$ , then  $g(t) = \sum_{i=1}^r \mathbf{z}_i - rt + (p-r)\theta$ .
- (5). If  $t \leq \mathbf{z}_p - \mathbf{z}_{p+1}$ , then  $g(t) = \sum_{i=1}^p \mathbf{z}_i - pt$ . ■

**Lemma 10** Consider  $g(t) = \sum_{i=1}^s \mathbf{z}_i - st$ ,  $t \in (0, \|\mathbf{z}\|_\infty]$ , where  $s = \text{num}(\mathbf{z}_i \geq t)$ . Let  $\mathbf{z}_{n+1} = 0$ . then  $g(t)$  is continuous, strictly decreasing and piecewise linear,  $g^-(\lambda)$  can be expressed as

$$g^-(\lambda) = \frac{\sum_{i=1}^k \mathbf{z}_i - \lambda}{k}, \quad \lambda \in \left[ \sum_{i=1}^k \mathbf{z}_i - k\mathbf{z}_k, \sum_{i=1}^{k+1} \mathbf{z}_i - (k+1)\mathbf{z}_{k+1} \right), k = 1, \dots, n.$$

**Proof** If  $t \in (\mathbf{z}_{k+1}, \mathbf{z}_k]$  with fixed  $k$ , then  $s = k$  and  $g(t) = \sum_{i=1}^k \mathbf{z}_i - kt$ , so  $g(t)$  is continuous, piecewise linear and strictly decreasing. So

$$g^-(\lambda) = \frac{\sum_{i=1}^k \mathbf{z}_i - \lambda}{k}, \lambda \in \left[ \sum_{i=1}^k \mathbf{z}_i - k\mathbf{z}_k, \sum_{i=1}^{k+1} \mathbf{z}_i - (k+1)\mathbf{z}_{k+1} \right), k = 1, \dots, n,$$

and  $g^-(\lambda) \in (0, \|\mathbf{z}\|_\infty]$ . ■

**Lemma 11** Consider  $g(t) = p\theta$ ,  $t \in \left(0, \frac{1}{p}\|\mathbf{z}\|_1\right]$ , where  $\theta$  and  $t$  satisfies  $\sum_{\mathbf{c}_i > \theta} (\mathbf{c}_i - \theta) = pt$ , then  $g(t)$  is continuous, piecewise linear and strictly decreasing, let  $\mathbf{z}_{n+1} = 0$ , then  $g^-(\lambda)$  can be expressed as

$$g^-(\lambda) = \frac{\sum_{i=1}^k \mathbf{z}_i}{p} - \frac{k\lambda}{p^2}, \quad \lambda \in [p\mathbf{z}_{k+1}, p\mathbf{z}_k), k = 1, 2, \dots, n.$$

**Proof** Fix  $\theta \in [\mathbf{z}_{k+1}, \mathbf{z}_k)$ , we have

$$\begin{aligned} t &= \frac{\sum_{i=1}^k \mathbf{z}_i - k\theta}{p} \\ &\in \left( \frac{\sum_{i=1}^k \mathbf{z}_i - k\mathbf{z}_k}{p}, \frac{\sum_{i=1}^k \mathbf{z}_i - k\mathbf{z}_{k+1}}{p} \right] \\ &= \left( \frac{\sum_{i=1}^k \mathbf{z}_i - k\mathbf{z}_k}{p}, \frac{\sum_{i=1}^{k+1} \mathbf{z}_i - (k+1)\mathbf{z}_{k+1}}{p} \right] \end{aligned}$$

and  $\theta = \frac{\sum_{i=1}^k \mathbf{z}_i - pt}{k}$ . So

$$g(t) = p \frac{\sum_{i=1}^k \mathbf{z}_i - pt}{k}, \quad t \in \left( \frac{\sum_{i=1}^k \mathbf{z}_i - k\mathbf{z}_k}{p}, \frac{\sum_{i=1}^{k+1} \mathbf{z}_i - (k+1)\mathbf{z}_{k+1}}{p} \right].$$

$g(t)$  is continuous, linear function and strictly decreasing.

$$g^-(\lambda) = \frac{\sum_{i=1}^k \mathbf{z}_i}{p} - \frac{k\lambda}{p^2}, \quad \lambda \in [p\mathbf{z}_{k+1}, p\mathbf{z}_k), k = 1, 2, \dots, n.$$

And we have  $g^-(\lambda) \in \left(0, \frac{\|\mathbf{z}\|_1}{p}\right]$ . ■

**Lemma 12** *Define interval*

$$S(r, d) = \left( \max \left\{ \frac{\sum_{i=r+1}^d (\mathbf{z}_{r+1} - \mathbf{z}_i)}{d-p}, \frac{\sum_{i=r+1}^d (\mathbf{z}_i - \mathbf{z}_d)}{p-r} \right\}, \min \left\{ \frac{\sum_{i=r+1}^d (\mathbf{z}_r - \mathbf{z}_i)}{d-p}, \frac{\sum_{i=r+1}^d (\mathbf{z}_i - \mathbf{z}_{d+1})}{p-r} \right\} \right)$$

with  $r < p < d$ . Let  $r - j + 1 = \min\{i : \mathbf{z}_i = \mathbf{z}_r\}$ ,  $d + k = \max\{i : \mathbf{z}_i = \mathbf{z}_{d+1}\}$ ,  $p - j + 1 = \min\{i : \mathbf{z}_i = \mathbf{z}_p\}$ ,  $p + k = \max\{i : \mathbf{z}_i = \mathbf{z}_{p+1}\}$ ,  $\mathbf{z}_0 = \infty$  and  $\mathbf{z}_{n+1} = 0$ . Then we can divide  $(\mathbf{z}_p - \mathbf{z}_{p+1}, t^*)$  if  $\|\mathbf{z}\|_\infty \geq \frac{1}{p}\|\mathbf{z}\|_1$  and  $(\mathbf{z}_p - \mathbf{z}_{p+1}, \|\mathbf{z}\|_\infty)$  if  $\|\mathbf{z}\|_\infty < \frac{1}{p}\|\mathbf{z}\|_1$  into several disjoint and connected intervals by the following way: Go right from non-empty  $S(p - j, p + k)$ , if  $S(r, d)$  is non-empty, then for  $S(r, d)$  with  $r \geq 0$ ,  $d \leq n$ ,

1. If  $\max \left\{ \frac{\sum_{i=r+1}^d (\mathbf{z}_{r+1} - \mathbf{z}_i)}{d-p}, \frac{\sum_{i=r+1}^d (\mathbf{z}_i - \mathbf{z}_d)}{p-r} \right\} < \frac{\sum_{i=r+1}^d (\mathbf{z}_r - \mathbf{z}_i)}{d-p} < \frac{\sum_{i=r+1}^d (\mathbf{z}_i - \mathbf{z}_{d+1})}{p-r}$ , then the right hand side of  $S(r, d)$  is  $S(r - j, d)$  and  $S(r - j, d)$  is non-empty.
2. If  $\max \left\{ \frac{\sum_{i=r+1}^d (\mathbf{z}_{r+1} - \mathbf{z}_i)}{d-p}, \frac{\sum_{i=r+1}^d (\mathbf{z}_i - \mathbf{z}_d)}{p-r} \right\} < \frac{\sum_{i=r+1}^d (\mathbf{z}_i - \mathbf{z}_{d+1})}{p-r} < \frac{\sum_{i=r+1}^d (\mathbf{z}_r - \mathbf{z}_i)}{d-p}$ , then the right hand side of  $S(r, d)$  is  $S(r, d + k)$  and  $S(r, d + k)$  is non-empty.
3. If  $\max \left\{ \frac{\sum_{i=r+1}^d (\mathbf{z}_{r+1} - \mathbf{z}_i)}{d-p}, \frac{\sum_{i=r+1}^d (\mathbf{z}_i - \mathbf{z}_d)}{p-r} \right\} < \frac{\sum_{i=r+1}^d (\mathbf{z}_i - \mathbf{z}_{d+1})}{p-r} = \frac{\sum_{i=r+1}^d (\mathbf{z}_r - \mathbf{z}_i)}{d-p}$ , then the right hand side of  $S(r, d)$  is  $S(r - j, d + k)$  and  $S(r - j, d + k)$  is non-empty.

**Proof** We begin with  $S(p - j, p + k)$ . Since  $\mathbf{z}_{p-j} > \mathbf{z}_{p-j+1} = \dots = \mathbf{z}_p$ ,  $\mathbf{z}_{p+1} = \dots = \mathbf{z}_{p+k} > \mathbf{z}_{p+k+1}$ , then  $S(p - j, p + k) = \left( \mathbf{z}_p - \mathbf{z}_{p+1}, \min \left\{ \frac{(k+j)\mathbf{z}_{p-j} - j\mathbf{z}_p - k\mathbf{z}_{p+1}}{k}, \frac{j\mathbf{z}_p + k\mathbf{z}_{p+1} - (k+j)\mathbf{z}_{p+k+1}}{j} \right\} \right)$  is nonempty and on the most left of  $(\mathbf{z}_p - \mathbf{z}_{p+1}, t^*)$  and  $(\mathbf{z}_p - \mathbf{z}_{p+1}, \|\mathbf{z}\|_\infty)$ . So we should go right from  $S(p - j, p + k)$ . We will prove that for every nonempty  $S(r, d)$ , we can find a nonempty interval connected with  $S(r, d)$  on its right hand side.

Case 1: If  $\max \left\{ \frac{\sum_{i=r+1}^d (\mathbf{z}_{r+1} - \mathbf{z}_i)}{d-p}, \frac{\sum_{i=r+1}^d (\mathbf{z}_i - \mathbf{z}_d)}{p-r} \right\} < \frac{\sum_{i=r+1}^d (\mathbf{z}_r - \mathbf{z}_i)}{d-p} < \frac{\sum_{i=r+1}^d (\mathbf{z}_i - \mathbf{z}_{d+1})}{p-r}$ , then  $S(r, d) = \left( \max \left\{ \frac{\sum_{i=r+1}^d (\mathbf{z}_{r+1} - \mathbf{z}_i)}{d-p}, \frac{\sum_{i=r+1}^d (\mathbf{z}_i - \mathbf{z}_d)}{p-r} \right\}, \frac{\sum_{i=r+1}^d (\mathbf{z}_r - \mathbf{z}_i)}{d-p} \right)$ ,  $\mathbf{z}_r > \mathbf{z}_{r+1}$ . From the def-

inition of  $r - j + 1$ , we have  $\mathbf{z}_{r-j} > \mathbf{z}_{r-j+1} = \cdots = \mathbf{z}_r > \mathbf{z}_{r+1}$ . Since

$$\begin{aligned}
 & \frac{\sum_{i=r+1}^d (\mathbf{z}_i - \mathbf{z}_d)}{p-r} < \frac{\sum_{i=r+1}^d (\mathbf{z}_r - \mathbf{z}_i)}{d-p} \\
 \Leftrightarrow & (p-r)\mathbf{z}_r + (d-p)\mathbf{z}_d > \sum_{i=r+1}^d \mathbf{z}_i \\
 \Leftrightarrow & (p-r)\mathbf{z}_r + \sum_{i=r-j+1}^r \mathbf{z}_i + (d-p)\mathbf{z}_d > \sum_{i=r-j+1}^d \mathbf{z}_i \\
 \Leftrightarrow & (p-r+j)\mathbf{z}_{r-j+1} + (d-p)\mathbf{z}_d > \sum_{i=r-j+1}^d \mathbf{z}_i \\
 \Leftrightarrow & \frac{\sum_{i=r-j+1}^d (\mathbf{z}_i - \mathbf{z}_d)}{p-r+j} < \frac{\sum_{i=r-j+1}^d (\mathbf{z}_{r-j+1} - \mathbf{z}_i)}{d-p}.
 \end{aligned}$$

then

$$\begin{aligned}
 S(r-j, d) &= \left( \max \left\{ \frac{\sum_{i=r-j+1}^d (\mathbf{z}_{r-j+1} - \mathbf{z}_i)}{d-p}, \frac{\sum_{i=r-j+1}^d (\mathbf{z}_i - \mathbf{z}_d)}{p-r+j} \right\}, \right. \\
 & \quad \left. \min \left\{ \frac{\sum_{i=r-j+1}^d (\mathbf{z}_{r-j} - \mathbf{z}_i)}{d-p}, \frac{\sum_{i=r-j+1}^d (\mathbf{z}_i - \mathbf{z}_{d+1})}{p-r+j} \right\} \right] \\
 &= \left( \frac{\sum_{i=r-j+1}^d (\mathbf{z}_{r-j+1} - \mathbf{z}_i)}{d-p}, \min \left\{ \frac{\sum_{i=r-j+1}^d (\mathbf{z}_{r-j} - \mathbf{z}_i)}{d-p}, \frac{\sum_{i=r-j+1}^d (\mathbf{z}_i - \mathbf{z}_{d+1})}{p-r+j} \right\} \right) \\
 &= \left( \frac{\sum_{i=r+1}^d (\mathbf{z}_r - \mathbf{z}_i)}{d-p}, \min \left\{ \frac{\sum_{i=r-j+1}^d (\mathbf{z}_{r-j} - \mathbf{z}_i)}{d-p}, \frac{\sum_{i=r-j+1}^d (\mathbf{z}_i - \mathbf{z}_{d+1})}{p-r+j} \right\} \right).
 \end{aligned}$$

is on the right hand side of  $S(r, d)$ . It can be easily checked that  $\frac{\sum_{i=r-j+1}^d (\mathbf{z}_{r-j+1} - \mathbf{z}_i)}{d-p} < \frac{\sum_{i=r+1}^d (\mathbf{z}_r - \mathbf{z}_i)}{d-p}$ . Since

$$\begin{aligned}
 & \frac{\sum_{i=r+1}^d (\mathbf{z}_r - \mathbf{z}_i)}{d-p} < \frac{\sum_{i=r+1}^d (\mathbf{z}_i - \mathbf{z}_{d+1})}{p-r} \\
 \Leftrightarrow & (p-r)\mathbf{z}_r + (d-p)\mathbf{z}_{d+1} < \sum_{i=r+1}^d \mathbf{z}_i \\
 \Leftrightarrow & (p-r)\mathbf{z}_r + \sum_{i=r-j+1}^r \mathbf{z}_i + (d-p)\mathbf{z}_{d+1} < \sum_{i=r-j+1}^d \mathbf{z}_i \\
 \Leftrightarrow & (p+j-r)\mathbf{z}_{r-j+1} + (d-p)\mathbf{z}_{d+1} < \sum_{i=r-j+1}^d \mathbf{z}_i \\
 \Leftrightarrow & \frac{\sum_{i=r-j+1}^d (\mathbf{z}_{r-j+1} - \mathbf{z}_i)}{d-p} < \frac{\sum_{i=r-j+1}^d (\mathbf{z}_i - \mathbf{z}_{d+1})}{p-r+j}.
 \end{aligned}$$



So  $S(r-j, d)$  is not empty.

Case 2: If  $\max \left\{ \frac{\sum_{i=r+1}^d (\mathbf{z}_{r+1} - \mathbf{z}_i)}{d-p}, \frac{\sum_{i=r+1}^d (\mathbf{z}_i - \mathbf{z}_d)}{p-r} \right\} < \frac{\sum_{i=r+1}^d (\mathbf{z}_i - \mathbf{z}_{d+1})}{p-r} < \frac{\sum_{i=r+1}^d (\mathbf{z}_r - \mathbf{z}_i)}{d-p}$ , so  $S(r, d) = \left( \max \left\{ \frac{\sum_{i=r+1}^d (\mathbf{z}_{r+1} - \mathbf{z}_i)}{d-p}, \frac{\sum_{i=r+1}^d (\mathbf{z}_i - \mathbf{z}_d)}{p-r} \right\}, \frac{\sum_{i=r+1}^d (\mathbf{z}_i - \mathbf{z}_{d+1})}{p-r} \right]$  and  $\mathbf{z}_{d+1} < \mathbf{z}_d$ . From the definition of  $d+k$ , we have  $\mathbf{z}_{d+k+1} < \mathbf{z}_{d+k} = \dots = \mathbf{z}_{d+1} < \mathbf{z}_d$ . Since

$$\begin{aligned} & \frac{\sum_{i=r+1}^d (\mathbf{z}_{r+1} - \mathbf{z}_i)}{d-p} < \frac{\sum_{i=r+1}^d (\mathbf{z}_i - \mathbf{z}_{d+1})}{p-r} \\ \Leftrightarrow & (p-r)\mathbf{z}_{r+1} + (d-p)\mathbf{z}_{d+1} < \sum_{i=r+1}^d \mathbf{z}_i \\ \Leftrightarrow & (p-r)\mathbf{z}_{r+1} + (d-p)\mathbf{z}_{d+1} + \sum_{i=d+1}^{d+k} \mathbf{z}_i < \sum_{i=r+1}^{d+k} \mathbf{z}_i \\ \Leftrightarrow & (p-r)\mathbf{z}_{r+1} + (d+k-p)\mathbf{z}_{d+k} < \sum_{i=r+1}^{d+k} \mathbf{z}_i \\ \Leftrightarrow & \frac{\sum_{i=r+1}^{d+k} (\mathbf{z}_{r+1} - \mathbf{z}_i)}{d+k-p} < \frac{\sum_{i=r+1}^{d+k} (\mathbf{z}_i - \mathbf{z}_{d+k})}{p-r}. \end{aligned}$$

then

$$\begin{aligned} S(r, d+k) &= \left( \max \left\{ \frac{\sum_{i=r+1}^{d+k} (\mathbf{z}_{r+1} - \mathbf{z}_i)}{d+k-p}, \frac{\sum_{i=r+1}^{d+k} (\mathbf{z}_i - \mathbf{z}_{d+k})}{p-r} \right\} \right. \\ & \quad \left. \min \left\{ \frac{\sum_{i=r+1}^{d+k} (\mathbf{z}_r - \mathbf{z}_i)}{d+k-p}, \frac{\sum_{i=r+1}^{d+k} (\mathbf{z}_i - \mathbf{z}_{d+k+1})}{p-r} \right\} \right) \\ &= \left( \frac{\sum_{i=r+1}^{d+k} (\mathbf{z}_i - \mathbf{z}_{d+k})}{p-r}, \min \left\{ \frac{\sum_{i=r+1}^{d+k} (\mathbf{z}_r - \mathbf{z}_i)}{d+k-p}, \frac{\sum_{i=r+1}^{d+k} (\mathbf{z}_i - \mathbf{z}_{d+k+1})}{p-r} \right\} \right) \\ &= \left( \frac{\sum_{i=r+1}^d (\mathbf{z}_i - \mathbf{z}_{d+1})}{p-r}, \min \left\{ \frac{\sum_{i=r+1}^{d+k} (\mathbf{z}_r - \mathbf{z}_i)}{d+k-p}, \frac{\sum_{i=r+1}^{d+k} (\mathbf{z}_i - \mathbf{z}_{d+k+1})}{p-r} \right\} \right). \end{aligned}$$

is on the right hand side of  $S(r, d)$ . Since

$$\begin{aligned} & \frac{\sum_{i=r+1}^d (\mathbf{z}_r - \mathbf{z}_i)}{d-p} > \frac{\sum_{i=r+1}^d (\mathbf{z}_i - \mathbf{z}_{d+1})}{p-r} \\ \Leftrightarrow & \sum_{i=r+1}^d \mathbf{z}_i < (p-r)\mathbf{z}_r + (d-p)\mathbf{z}_{d+1} \\ \Leftrightarrow & \sum_{i=r+1}^{d+k} \mathbf{z}_i < (p-r)\mathbf{z}_r + (d-p)\mathbf{z}_{d+1} + \sum_{i=d+1}^{d+k} \mathbf{z}_i \end{aligned}$$

$$\begin{aligned}
 &\Leftrightarrow \sum_{i=r+1}^{d+k} \mathbf{z}_i < (p-r)\mathbf{z}_r + (d+k-p)\mathbf{z}_{d+k} \\
 &\Leftrightarrow \frac{\sum_{i=r+1}^{d+k} (\mathbf{z}_i - \mathbf{z}_{d+k})}{p-r} < \frac{\sum_{i=r+1}^{d+k} (\mathbf{z}_r - \mathbf{z}_i)}{d+k-p}.
 \end{aligned}$$

So  $S(r, d+k)$  is not empty.

Case 3: If  $\max \left\{ \frac{\sum_{i=r+1}^d (\mathbf{z}_{r+1} - \mathbf{z}_i)}{d-p}, \frac{\sum_{i=r+1}^d (\mathbf{z}_i - \mathbf{z}_d)}{p-r} \right\} < \frac{\sum_{i=r+1}^d (\mathbf{z}_i - \mathbf{z}_{d+1})}{p-r} = \frac{\sum_{i=r+1}^d (\mathbf{z}_r - \mathbf{z}_i)}{d-p}$ , then  $\mathbf{z}_{r+1} < \mathbf{z}_r$  and  $\mathbf{z}_{d+1} < \mathbf{z}_d$ . Since

$$\begin{aligned}
 &\frac{\sum_{i=r+1}^d (\mathbf{z}_i - \mathbf{z}_{d+1})}{p-r} = \frac{\sum_{i=r+1}^d (\mathbf{z}_r - \mathbf{z}_i)}{d-p} \\
 &\Leftrightarrow (p-r)\mathbf{z}_r + (d-p)\mathbf{z}_{d+1} = \sum_{i=r+1}^d \mathbf{z}_i \\
 &\Leftrightarrow (p-r)\mathbf{z}_r + \sum_{i=r-j+1}^r \mathbf{z}_i + (d-p)\mathbf{z}_{d+1} + \sum_{i=d+1}^{d+k} \mathbf{z}_i = \sum_{i=r-j+1}^{d+k} \mathbf{z}_i \\
 &\Leftrightarrow (p-r+j)\mathbf{z}_{r-j+1} + (d+k-p)\mathbf{z}_{d+k} = \sum_{i=r-j+1}^{d+k} \mathbf{z}_i \\
 &\Leftrightarrow \frac{\sum_{i=r-j+1}^{d+k} (\mathbf{z}_i - \mathbf{z}_{d+k})}{p-r+j} = \frac{\sum_{i=r-j+1}^{d+k} (\mathbf{z}_{r-j+1} - \mathbf{z}_i)}{d+k-p}.
 \end{aligned}$$

and

$$\sum_{i=r+1}^d \mathbf{z}_i - (d-r)\mathbf{z}_{d+1} = (p-r)\mathbf{z}_r + (d-p)\mathbf{z}_{d+1} - (d-r)\mathbf{z}_{d+1} = (p-r)(\mathbf{z}_r - \mathbf{z}_{d+1}),$$

then we have

$$\begin{aligned}
 &\frac{\sum_{i=r+1}^d (\mathbf{z}_i - \mathbf{z}_{d+1})}{p-r} = \frac{\sum_{i=r+1}^d (\mathbf{z}_r - \mathbf{z}_i)}{d-p} = \mathbf{z}_r - \mathbf{z}_{d+1}, \\
 &\frac{\sum_{i=r-j+1}^{d+k} (\mathbf{z}_i - \mathbf{z}_{d+k})}{p-r+j} = \frac{\sum_{i=r-j+1}^{d+k} (\mathbf{z}_{r-j+1} - \mathbf{z}_i)}{d+k-p} = \mathbf{z}_{r-j+1} - \mathbf{z}_{d+k} = \mathbf{z}_r - \mathbf{z}_{d+1}.
 \end{aligned}$$

So

$$S(r, d) = \left( \max \left\{ \frac{\sum_{i=r+1}^d (\mathbf{z}_{r+1} - \mathbf{z}_i)}{d-p}, \frac{\sum_{i=r+1}^d (\mathbf{z}_i - \mathbf{z}_d)}{p-r} \right\}, \mathbf{z}_r - \mathbf{z}_{d+1} \right),$$

and

$$\begin{aligned}
 S(r-j, d+k) &= \left( \max \left\{ \frac{\sum_{i=r-j+1}^{d+k} (\mathbf{z}_{r-j+1} - \mathbf{z}_i)}{d+k-p}, \frac{\sum_{i=r-j+1}^{d+k} (\mathbf{z}_i - \mathbf{z}_{d+k})}{p-r+j} \right\}, \right. \\
 &\quad \left. \min \left\{ \frac{\sum_{i=r-j+1}^{d+k} (\mathbf{z}_{r-j} - \mathbf{z}_i)}{d+k-p}, \frac{\sum_{i=r-j+1}^{d+k} (\mathbf{z}_i - \mathbf{z}_{d+k+1})}{p-r+j} \right\} \right] \\
 &= \left( \mathbf{z}_r - \mathbf{z}_{d+k}, \min \left\{ \frac{\sum_{i=r-j+1}^{d+k} (\mathbf{z}_{r-j} - \mathbf{z}_i)}{d+k-p}, \frac{\sum_{i=r-j+1}^{d+k} (\mathbf{z}_i - \mathbf{z}_{d+k+1})}{p-r+j} \right\} \right).
 \end{aligned}$$

is on the right hand side of  $S(r, d)$ . It can be easily checked that

$$\frac{\sum_{i=r-j+1}^{d+k} (\mathbf{z}_{r-j+1} - \mathbf{z}_i)}{d+k-p} < \frac{\sum_{i=r-j+1}^{d+k} (\mathbf{z}_{r-j} - \mathbf{z}_i)}{d+k-p} \quad \text{and} \quad \frac{\sum_{i=r-j+1}^{d+k} (\mathbf{z}_i - \mathbf{z}_{d+k})}{p-r+j} < \frac{\sum_{i=r-j+1}^{d+k} (\mathbf{z}_i - \mathbf{z}_{d+k+1})}{p-r+j}.$$

Since  $\mathbf{z}_r - \mathbf{z}_{d+1} = \frac{\sum_{i=r-j+1}^{d+k} (\mathbf{z}_i - \mathbf{z}_{d+k})}{p-r+j} = \frac{\sum_{i=r-j+1}^{d+k} (\mathbf{z}_{r-j+1} - \mathbf{z}_i)}{d+k-p}$ , thus  $S(r-j, d+k)$  is not empty.

Next, we consider two special cases:  $r = 0$  or  $d = n$ .

If  $r = 0$ , consider  $S(0, d) = \left( \max \left\{ \frac{\sum_{i=1}^d (\mathbf{z}_1 - \mathbf{z}_i)}{d-p}, \frac{\sum_{i=1}^d (\mathbf{z}_i - \mathbf{z}_d)}{p} \right\}, \frac{\sum_{i=1}^d (\mathbf{z}_i - \mathbf{z}_{d+1})}{p} \right]$ . From the analysis of case 2, the right hand side of  $S(0, d)$  is  $S(0, d+k)$  and  $S(0, d+k)$  is nonempty. Moreover,  $S(0, n) = \left( \max \left\{ \frac{\sum_{i=1}^n (\mathbf{z}_1 - \mathbf{z}_i)}{n-p}, \frac{\sum_{i=1}^n (\mathbf{z}_i - \mathbf{z}_n)}{p} \right\}, \frac{\sum_{i=1}^n \mathbf{z}_i}{p} \right]$ . If  $\|\mathbf{z}\|_1 \leq p\|\mathbf{z}\|_\infty$ , then  $t^* \leq \|\mathbf{z}\|_1/p$  and  $S(0, n)$  reaches the right hand side of  $[\mathbf{z}_p - \mathbf{z}_{p+1}, t^*]$ . If  $\|\mathbf{z}\|_1 > p\|\mathbf{z}\|_\infty$ , then  $S(0, n)$  reaches the right hand side of  $[\mathbf{z}_p - \mathbf{z}_{p+1}, \|\mathbf{z}\|_\infty]$ .

If  $d = n$ , consider

$$S(r, n) = \left( \max \left\{ \frac{\sum_{i=r+1}^n (\mathbf{z}_{r+1} - \mathbf{z}_i)}{n-p}, \frac{\sum_{i=r+1}^n (\mathbf{z}_i - \mathbf{z}_n)}{p-r} \right\}, \min \left\{ \frac{\sum_{i=r+1}^n (\mathbf{z}_r - \mathbf{z}_i)}{n-p}, \frac{\sum_{i=r+1}^n \mathbf{z}_i}{p-r} \right\} \right].$$

If  $\|\mathbf{z}\|_1 > p\|\mathbf{z}\|_\infty$ , then  $\sum_{i=r+1}^n \mathbf{z}_i > p\mathbf{z}_1 - \sum_{i=1}^r \mathbf{z}_i = (p-r)\mathbf{z}_1 + r\mathbf{z}_1 - \sum_{i=1}^r \mathbf{z}_i \geq (p-r)\mathbf{z}_1 \geq (p-r)\mathbf{z}_r$ , which is equivalent to  $\frac{\sum_{i=r+1}^n (\mathbf{z}_r - \mathbf{z}_i)}{n-p} < \frac{\sum_{i=r+1}^n \mathbf{z}_i}{p-r}$ , so we have  $\max \left\{ \frac{\sum_{i=r+1}^n (\mathbf{z}_{r+1} - \mathbf{z}_i)}{n-p}, \frac{\sum_{i=r+1}^n (\mathbf{z}_i - \mathbf{z}_n)}{p-r} \right\} < \frac{\sum_{i=r+1}^n (\mathbf{z}_r - \mathbf{z}_i)}{n-p} < \frac{\sum_{i=r+1}^n \mathbf{z}_i}{p-r}$  and then it reduces case 1, the right hand side of  $S(r, n)$  is  $S(r-j, n)$  and  $S(r-j, n)$  is not empty.

If  $\|\mathbf{z}\|_1 \leq p\|\mathbf{z}\|_\infty$ , if  $\max \left\{ \frac{\sum_{i=r+1}^n (\mathbf{z}_{r+1} - \mathbf{z}_i)}{n-p}, \frac{\sum_{i=r+1}^n (\mathbf{z}_i - \mathbf{z}_n)}{p-r} \right\} < \frac{\sum_{i=r+1}^n (\mathbf{z}_r - \mathbf{z}_i)}{n-p} < \frac{\sum_{i=r+1}^n \mathbf{z}_i}{p-r}$ , then the right hand side of  $S(r, n)$  is  $S(r-j, n)$  and  $S(r-j, n)$  is nonempty. Otherwise, we claim that  $S(r, n)$  reaches the right hand side of  $(\mathbf{z}_p - \mathbf{z}_{p+1}, t^*)$  by proving  $\frac{\sum_{i=r+1}^n \mathbf{z}_i}{p-r} = t^*$ . Let  $t = \frac{\sum_{i=r+1}^n \mathbf{z}_i}{p-r}$ . Since

$$\begin{aligned}
 \frac{\sum_{i=r+1}^n (\mathbf{z}_{r+1} - \mathbf{z}_i)}{n-p} < \frac{\sum_{i=r+1}^n \mathbf{z}_i}{p-r} &\Leftrightarrow (p-r)\mathbf{z}_{r+1} < \sum_{i=r+1}^n \mathbf{z}_i, \\
 \frac{\sum_{i=r+1}^n (\mathbf{z}_r - \mathbf{z}_i)}{n-p} \geq \frac{\sum_{i=r+1}^n \mathbf{z}_i}{p-r} &\Leftrightarrow (p-r)\mathbf{z}_r \geq \sum_{i=r+1}^n \mathbf{z}_i,
 \end{aligned}$$

so  $\mathbf{z}_r \geq t > \mathbf{z}_{r+1}$ . Thus  $\text{num}(\mathbf{z}_i \geq t) + \frac{\sum_{\mathbf{z}_i < t} \mathbf{z}_i}{t} = r + \frac{\sum_{i=r+1}^n \mathbf{z}_i}{t} = p$ , from lemma 7 we know  $h(t) = \text{num}(\mathbf{z}_i \geq t) + \frac{\sum_{\mathbf{z}_i < t} \mathbf{z}_i}{t}$  is strictly decreasing and  $h(t^*) = p$ , so  $t = t^*$ .  $\blacksquare$

**Lemma 13** Consider  $g(t) = \sum_{i=1}^r \mathbf{z}_i - rt + (p-r)\theta$  with  $t \in (\mathbf{z}_p - \mathbf{z}_{p+1}, t^*)$  if  $\|\mathbf{z}\|_\infty \geq \frac{1}{p}\|\mathbf{z}\|_1$  and  $t \in (\mathbf{z}_p - \mathbf{z}_{p+1}, \|\mathbf{z}\|_\infty)$  if  $\|\mathbf{z}\|_\infty < \frac{1}{p}\|\mathbf{z}\|_1$ , then for each interval  $S(r, d)$  constructed in Lemma 12, we have

$$g(t) = \sum_{i=1}^r \mathbf{z}_i - rt + (p-r) \frac{\sum_{i=r+1}^d \mathbf{z}_i - (p-r)t}{d-r}, \quad \forall t \in S(r, d),$$

and

$$g^-(\lambda) = \frac{d-r}{dr + p^2 - 2pr} \left( \sum_{i=1}^r \mathbf{z}_i + \frac{p-r}{d-r} \sum_{i=r+1}^d \mathbf{z}_i - \lambda \right), \quad \forall \lambda \in g(S(r, d)),$$

where  $g(S(r, d))$  means the function value  $g(t)$  on the interval  $S(r, d)$ . Moreover,  $g(t)$  and  $g^-(\lambda)$  is continuous, piecewise linear and strictly decreasing.

**Proof**  $t \in S(r, d) \neq \emptyset$  is equivalent to

$$\begin{aligned} \frac{\sum_{i=r+1}^d (\mathbf{z}_r - \mathbf{z}_i)}{d-p} &\geq t > \frac{\sum_{i=r+1}^d (\mathbf{z}_{r+1} - \mathbf{z}_i)}{d-p}, \\ \frac{\sum_{i=r+1}^d (\mathbf{z}_i - \mathbf{z}_{d+1})}{p-r} &\geq t > \frac{\sum_{i=r+1}^d (\mathbf{z}_i - \mathbf{z}_d)}{p-r}. \end{aligned}$$

which can be further written as

$$\begin{aligned} \mathbf{z}_r - t &\geq \frac{\sum_{i=r+1}^d \mathbf{z}_i - (p-r)t}{d-r}, & \mathbf{z}_{r+1} - t &< \frac{\sum_{i=r+1}^d \mathbf{z}_i - (p-r)t}{d-r}, \\ \mathbf{z}_{d+1} &\leq \frac{\sum_{i=r+1}^d \mathbf{z}_i - (p-r)t}{d-r}, & \mathbf{z}_d &> \frac{\sum_{i=r+1}^d \mathbf{z}_i - (p-r)t}{d-r}. \end{aligned}$$

On the other hand, fix  $t, r, d$ , consider  $\theta$  satisfying

$$\mathbf{z}_r - t \geq \theta, \quad \mathbf{z}_{r+1} - t < \theta, \quad \mathbf{z}_{d+1} \leq \theta, \quad \mathbf{z}_d > \theta, \quad r < p < d, \quad (19)$$

then

$$h(\theta) = \text{num}(\mathbf{z}_i - \theta \geq t) \times t + \sum_{0 < \mathbf{z}_i - \theta < t} (\mathbf{z}_i - \theta) = rt + \sum_{i=r+1}^d (\mathbf{z}_i - \theta)$$

is strictly decreasing. So  $\theta = \frac{\sum_{i=r+1}^d \mathbf{z}_i - (p-r)t}{d-r}$  is the unique solution for  $h(\theta) = pt$  satisfying (19). Thus we have

$$g(t) = \sum_{i=1}^r \mathbf{z}_i - rt + (p-r) \frac{\sum_{i=r+1}^d \mathbf{z}_i - (p-r)t}{d-r}, \quad \forall t \in S(r, d),$$

and  $g(t)$  is a linear strictly decreasing function in  $S(r, d)$ .

Now we prove that  $g(t)$  is continuous.

Case 1:

If  $\max \left\{ \frac{\sum_{i=r+1}^d (\mathbf{z}_{r+1} - \mathbf{z}_i)}{d-p}, \frac{\sum_{i=r+1}^d (\mathbf{z}_i - \mathbf{z}_d)}{p-r} \right\} < \frac{\sum_{i=r+1}^d (\mathbf{z}_r - \mathbf{z}_i)}{d-p} < \frac{\sum_{i=r+1}^d (\mathbf{z}_i - \mathbf{z}_{d+1})}{p-r}$ , then  $S(r, d) = \left( \max \left\{ \frac{\sum_{i=r+1}^d (\mathbf{z}_{r+1} - \mathbf{z}_i)}{d-p}, \frac{\sum_{i=r+1}^d (\mathbf{z}_i - \mathbf{z}_d)}{p-r} \right\}, \frac{\sum_{i=r+1}^d (\mathbf{z}_r - \mathbf{z}_i)}{d-p} \right]$ , and  $S(r-j, d) = \left( \frac{\sum_{i=r+1}^d (\mathbf{z}_r - \mathbf{z}_i)}{d-p}, \min \left\{ \frac{\sum_{i=r-j+1}^d (\mathbf{z}_{r-j} - \mathbf{z}_i)}{d-p}, \frac{\sum_{i=r-j+1}^d (\mathbf{z}_i - \mathbf{z}_{d+1})}{p-r+j} \right\} \right]$  is on the right hand side of  $S(r, d)$ . Consider the interval  $S(r, d)$ , we have  $g \left( \frac{\sum_{i=r+1}^d (\mathbf{z}_r - \mathbf{z}_i)}{d-p} \right) = \sum_{i=1}^r \mathbf{z}_i + \frac{p-r}{d-r} \sum_{i=r+1}^d \mathbf{z}_i - \left( r + \frac{(p-r)^2}{d-r} \right) \frac{\sum_{i=r+1}^d (\mathbf{z}_r - \mathbf{z}_i)}{d-p}$ . Consider  $S(r-j, d)$ , we have

$$\begin{aligned}
 & \lim_{t \rightarrow \frac{\sum_{i=r+1}^d (\mathbf{z}_r - \mathbf{z}_i)}{d-p}} g(t) \\
 &= \sum_{i=1}^{r-j} \mathbf{z}_i + \frac{p-r+j}{d-r+j} \sum_{i=r-j+1}^d \mathbf{z}_i - \left( r-j + \frac{(p-r+j)^2}{d-r+j} \right) \frac{\sum_{i=r+1}^d (\mathbf{z}_r - \mathbf{z}_i)}{d-p} \\
 &= \sum_{i=1}^r \mathbf{z}_i - j\mathbf{z}_r + \frac{p-r+j}{d-r+j} \left( \sum_{i=r+1}^d \mathbf{z}_i + j\mathbf{z}_r \right) - \left( r-j + \frac{(p-r+j)^2}{d-r+j} \right) \frac{\sum_{i=r+1}^d (\mathbf{z}_r - \mathbf{z}_i)}{d-p} \\
 &= g \left( \frac{\sum_{i=r+1}^d (\mathbf{z}_r - \mathbf{z}_i)}{d-p} \right) - j\mathbf{z}_r + \frac{p-r+j}{d-r+j} j\mathbf{z}_r + \sum_{i=r+1}^d \mathbf{z}_i \left( \frac{p-r+j}{d-r+j} - \frac{p-r}{d-r} \right) \\
 &\quad - \frac{\sum_{i=r+1}^d (\mathbf{z}_r - \mathbf{z}_i)}{d-p} \left( \frac{(p-r+j)^2}{d-r+j} - j - \frac{(p-r)^2}{d-r} \right) \\
 &= g \left( \frac{\sum_{i=r+1}^d (\mathbf{z}_r - \mathbf{z}_i)}{d-p} \right) - \frac{d-p}{d-r+j} j\mathbf{z}_r + \frac{j(d-p) \sum_{i=r+1}^d \mathbf{z}_i}{(d-r+j)(d-r)} + \frac{j(d-p) \sum_{i=r+1}^d (\mathbf{z}_r - \mathbf{z}_i)}{(d-r+j)(d-r)} \\
 &= g \left( \frac{\sum_{i=r+1}^d (\mathbf{z}_r - \mathbf{z}_i)}{d-p} \right).
 \end{aligned}$$

Case 2: If  $\max \left\{ \frac{\sum_{i=r+1}^d (\mathbf{z}_{r+1} - \mathbf{z}_i)}{d-p}, \frac{\sum_{i=r+1}^d (\mathbf{z}_i - \mathbf{z}_d)}{p-r} \right\} < \frac{\sum_{i=r+1}^d (\mathbf{z}_i - \mathbf{z}_{d+1})}{p-r} < \frac{\sum_{i=r+1}^d (\mathbf{z}_r - \mathbf{z}_i)}{d-p}$ , then  $S(r, d) = \left( \max \left\{ \frac{\sum_{i=r+1}^d (\mathbf{z}_{r+1} - \mathbf{z}_i)}{d-p}, \frac{\sum_{i=r+1}^d (\mathbf{z}_i - \mathbf{z}_d)}{p-r} \right\}, \frac{\sum_{i=r+1}^d (\mathbf{z}_i - \mathbf{z}_{d+1})}{p-r} \right]$  and  $S(r, d+k) = \left( \frac{\sum_{i=r+1}^d (\mathbf{z}_i - \mathbf{z}_{d+1})}{p-r}, \min \left\{ \frac{\sum_{i=r+1}^{d+k} (\mathbf{z}_r - \mathbf{z}_i)}{d+k-p}, \frac{\sum_{i=r+1}^{d+k} (\mathbf{z}_i - \mathbf{z}_{d+k+1})}{p-r} \right\} \right]$  is on the right hand side of  $S(r, d)$ . Consider the interval  $S(r, d)$ , we have  $g \left( \frac{\sum_{i=r+1}^d (\mathbf{z}_i - \mathbf{z}_{d+1})}{p-r} \right) = \sum_{i=1}^r \mathbf{z}_i +$

$\frac{p-r}{d-r} \sum_{i=r+1}^d \mathbf{z}_i - \left( r + \frac{(p-r)^2}{d-r} \right) \frac{\sum_{i=r+1}^d (\mathbf{z}_i - \mathbf{z}_{d+1})}{p-r}$ . Consider  $S(r, d+k)$ , we have

$$\begin{aligned}
 & \lim_{t \rightarrow \frac{\sum_{i=r+1}^d (\mathbf{z}_i - \mathbf{z}_{d+1})}{p-r}} g(t) \\
 = & \sum_{i=1}^r \mathbf{z}_i + \frac{p-r}{d+k-r} \sum_{i=r+1}^{d+k} \mathbf{z}_i - \left( r + \frac{(p-r)^2}{d+k-r} \right) \frac{\sum_{i=r+1}^d (\mathbf{z}_i - \mathbf{z}_{d+1})}{p-r} \\
 = & \sum_{i=1}^r \mathbf{z}_i + \frac{p-r}{d+k-r} \left( \sum_{i=r+1}^d \mathbf{z}_i + k\mathbf{z}_{d+1} \right) - \left( r + \frac{(p-r)^2}{d+k-r} \right) \frac{\sum_{i=r+1}^d (\mathbf{z}_i - \mathbf{z}_{d+1})}{p-r} \\
 = & g \left( \frac{\sum_{i=r+1}^d (\mathbf{z}_i - \mathbf{z}_{d+1})}{p-r} \right) + \frac{(p-r)k\mathbf{z}_{d+1}}{d+k-r} + \sum_{i=r+1}^d \mathbf{z}_i \left( \frac{p-r}{d+k-r} - \frac{p-r}{d-r} \right) \\
 & - \frac{\sum_{i=r+1}^d (\mathbf{z}_i - \mathbf{z}_{d+1})}{p-r} \left( \frac{(p-r)^2}{d+k-r} - \frac{(p-r)^2}{d-r} \right) \\
 = & g \left( \frac{\sum_{i=r+1}^d (\mathbf{z}_i - \mathbf{z}_{d+1})}{p-r} \right) + \frac{(p-r)k\mathbf{z}_{d+1}}{d+k-r} - \frac{k(p-r) \sum_{i=r+1}^d \mathbf{z}_i}{(d+k-r)(d-r)} + \frac{k(p-r) \sum_{i=r+1}^d (\mathbf{z}_i - \mathbf{z}_{d+1})}{(d+k-r)(d-r)} \\
 = & g \left( \frac{\sum_{i=r+1}^d (\mathbf{z}_i - \mathbf{z}_{d+1})}{p-r} \right).
 \end{aligned}$$

Case 3: If  $\max \left\{ \frac{\sum_{i=r+1}^d (\mathbf{z}_{r+1} - \mathbf{z}_i)}{d-p}, \frac{\sum_{i=r+1}^d (\mathbf{z}_i - \mathbf{z}_d)}{p-r} \right\} < \frac{\sum_{i=r+1}^d (\mathbf{z}_i - \mathbf{z}_{d+1})}{p-r} = \frac{\sum_{i=r+1}^d (\mathbf{z}_r - \mathbf{z}_i)}{d-p}$ , then

$$\frac{\sum_{i=r+1}^d (\mathbf{z}_i - \mathbf{z}_{d+1})}{p-r} = \frac{\sum_{i=r+1}^d (\mathbf{z}_r - \mathbf{z}_i)}{d-p} = \mathbf{z}_r - \mathbf{z}_{d+1},$$

$$S(r, d) = \left( \max \left\{ \frac{\sum_{i=r+1}^d (\mathbf{z}_{r+1} - \mathbf{z}_i)}{d-p}, \frac{\sum_{i=r+1}^d (\mathbf{z}_i - \mathbf{z}_d)}{p-r} \right\}, \mathbf{z}_r - \mathbf{z}_{d+1} \right],$$

$S(r-j, d+k) = \left( \mathbf{z}_r - \mathbf{z}_{d+1}, \min \left\{ \frac{\sum_{i=r-j+1}^{d+k} (\mathbf{z}_{r-j} - \mathbf{z}_i)}{d+k-p}, \frac{\sum_{i=r-j+1}^{d+k} (\mathbf{z}_i - \mathbf{z}_{d+k+1})}{p-r+j} \right\} \right]$  is on the right hand side of  $S(r, d)$ . Consider the interval  $S(r, d)$ , we have

$$\begin{aligned}
 g(\mathbf{z}_r - \mathbf{z}_{d+1}) &= \sum_{i=1}^r \mathbf{z}_i + \frac{p-r}{d-r} \sum_{i=r+1}^d \mathbf{z}_i - \left( r + \frac{(p-r)^2}{d-r} \right) (\mathbf{z}_r - \mathbf{z}_{d+1}) \\
 &= \sum_{i=1}^r \mathbf{z}_i + \frac{p-r}{d-r} ((p-r)\mathbf{z}_r + (d-p)\mathbf{z}_{d+1}) - \left( r + \frac{(p-r)^2}{d-r} \right) (\mathbf{z}_r - \mathbf{z}_{d+1}) \\
 &= \sum_{i=1}^r \mathbf{z}_i - r\mathbf{z}_r + p\mathbf{z}_{d+1},
 \end{aligned}$$

and consider  $S(f - j, d + k)$  we have

$$\begin{aligned}
 & \lim_{t \rightarrow \mathbf{z}_r - \mathbf{z}_{d+1}} g(t) \\
 = & \sum_{i=1}^{r-j} \mathbf{z}_i + \frac{p-r+j}{d+k-r+j} \sum_{i=r-j+1}^{d+k} \mathbf{z}_i - \left( r-j + \frac{(p-r+j)^2}{d+k-r+j} \right) (\mathbf{z}_r - \mathbf{z}_{d+1}) \\
 = & \sum_{i=1}^r \mathbf{z}_i - j\mathbf{z}_r + \frac{p-r+j}{d+k-r+j} \left( \sum_{i=r+1}^d \mathbf{z}_i + j\mathbf{z}_r + k\mathbf{z}_{d+1} \right) - \left( r-j + \frac{(p-r+j)^2}{d+k-r+j} \right) (\mathbf{z}_r - \mathbf{z}_{d+1}) \\
 = & \sum_{i=1}^r \mathbf{z}_i - j\mathbf{z}_r + \frac{p-r+j}{d+k-r+j} ((p-r)\mathbf{z}_r + (d-p)\mathbf{z}_{d+1} + j\mathbf{z}_r + k\mathbf{z}_{d+1}) \\
 & - \left( r-j + \frac{(p-r+j)^2}{d+k-r+j} \right) (\mathbf{z}_r - \mathbf{z}_{d+1}) \\
 = & \sum_{i=1}^r \mathbf{z}_i + \mathbf{z}_r \left( -j + \frac{(p-r+j)^2}{d+k-r+j} - \left( r-j + \frac{(p-r+j)^2}{d+k-r+j} \right) \right) \\
 & + \mathbf{z}_{d+1} \left( \frac{(p-r+j)(d-p+k)}{d+k-r+j} + \left( r-j + \frac{(p-r+j)^2}{d+k-r+j} \right) \right) \\
 = & \sum_{i=1}^r \mathbf{z}_i - r\mathbf{z}_r + p\mathbf{z}_{d+1} \\
 = & g(\mathbf{z}_r - \mathbf{z}_{d+1}).
 \end{aligned}$$

So  $g(t)$  is continuous, piecewise linear and strictly decreasing in  $(\mathbf{z}_p - \mathbf{z}_{p+1}, t^*)$  if  $\|\mathbf{z}\|_\infty \geq \frac{1}{p}\|\mathbf{z}\|_1$  and in  $(\mathbf{z}_p - \mathbf{z}_{p+1}, \|\mathbf{z}\|_\infty)$  if  $\|\mathbf{z}\|_\infty < \frac{1}{p}\|\mathbf{z}\|_1$ .

We can easily get that

$$g^-(\lambda) = \frac{d-r}{dr+p^2-2pr} \left( \sum_{i=1}^r \mathbf{z}_i + \frac{p-r}{d-r} \sum_{i=r+1}^d \mathbf{z}_i - \lambda \right), \quad \forall \lambda \in g(S(r, d)).$$

and  $g^-(\lambda)$  is continuous, piecewise linear and strictly decreasing. ■

**Theorem 14**  $g(t) = \sum_{i=1}^p (\mathbf{z}_i - \mathbf{x}_i)$  with  $t \in [0, \max\{\|\mathbf{z}\|_\infty, \|\mathbf{z}\|_1/p\}]$  and its inverse function  $g^-(\lambda)$  with  $\lambda \in [0, \sum_{i=1}^p \mathbf{z}_i]$  are continuous, strictly decreasing and piecewise linear.

**Proof** Based on Lemma 10, 11 and 13, we only need to prove that  $g(t)$  is continuous at point  $t = \|\mathbf{z}\|_\infty, \|\mathbf{z}\|_1/p, t^*$  and  $\mathbf{z}_p - \mathbf{z}_{p+1}$ . We first consider  $\|\mathbf{z}\|_\infty \geq \|\mathbf{z}\|_1/p$ .

When  $t \xrightarrow{+} \|\mathbf{z}\|_\infty = \mathbf{z}_1$ , then  $s \equiv \text{num}(\mathbf{z}_i \geq t) \rightarrow k^* \equiv \max\{i, \mathbf{z}_i = \mathbf{z}_1\}$  and  $\lim_{t \rightarrow \mathbf{z}_1} h(t) = \sum_{i=1}^{k^*} \mathbf{z}_i - k^* \mathbf{z}_1 = 0$ .

When  $t \xrightarrow{+} t^*$ , then  $st + \sum_{\mathbf{z}_i < t} \mathbf{z}_i \xrightarrow{-} pt$ . We claim that  $\theta \rightarrow 0$ . Otherwise,  $pt = \sum_{i=1}^n \mathbf{x}_i \leq st + \sum_{i=s+1}^n \mathbf{z}_i = st + \sum_{\mathbf{z}_i < t} \mathbf{z}_i$ , where we use  $\mathbf{x}_i \leq t$  and  $\mathbf{x}_i \leq \mathbf{z}_i$ . So  $\mathbf{x}_i \rightarrow t, \forall i \leq s$  and  $\mathbf{x}_i \rightarrow \mathbf{z}_i, \forall i > s$ . On the other hand, From case 4 and case 2 of Theorem 4, we have  $\mathbf{x}_j = t$  if  $\mathbf{z}_j - \theta \geq t$ ;  $\mathbf{x}_j = \mathbf{z}_j - \theta$  if  $0 < \mathbf{z}_j - \theta < t$ ;  $\mathbf{x}_j = 0$  if  $\mathbf{z}_j \leq \theta$ . Thus  $\theta \rightarrow 0$ . So  $r \equiv \text{num}(\mathbf{z}_i - \theta \geq t) \rightarrow s$  and  $\lim_{t \rightarrow t^*} h(t) = \sum_{i=1}^s \mathbf{z}_i - st$ .

When  $t \xrightarrow{-} \mathbf{z}_p - \mathbf{z}_{p+1}$ , from case 4.3 and 4.1, we know  $pt = \sum_{i=1}^n \mathbf{x}_i$ . Thus there are two cases:  $\mathbf{x}_p = t$ ,  $\mathbf{x}_{p+1} = 0$ ;  $\mathbf{x}_p < t$ ,  $0 < \mathbf{x}_{p+1} < t$ . For the first case, we have  $\mathbf{z}_p - \theta \geq t$  and  $\mathbf{z}_{p+1} \leq \theta$ , thus  $\mathbf{z}_p - \mathbf{z}_{p+1} \geq t$ . Thus we have  $\mathbf{z}_p - \theta \rightarrow t$  and  $\mathbf{z}_{p+1} \rightarrow \theta$ . For the second case, we have  $\mathbf{z}_p - \theta < t$  and  $0 < \mathbf{z}_{p+1} - \theta$ , thus  $\mathbf{z}_p - \mathbf{z}_{p+1} < t$ . So we also have  $\mathbf{z}_p - \theta \rightarrow t$  and  $\mathbf{z}_{p+1} \rightarrow \theta$ . So  $r \rightarrow p$  and  $\lim_{t \xrightarrow{-} \mathbf{z}_p - \mathbf{z}_{p+1}} g(t) = \sum_{i=1}^p \mathbf{z}_i - pt$ .

Then we consider  $\|\mathbf{z}\|_\infty < \|\mathbf{z}\|_1/p$ . When  $t \xrightarrow{+} \|c\|_1/p$ , from  $\sum_{\mathbf{z}_i > \theta} (\mathbf{z}_i - \theta) = pt \rightarrow \|\mathbf{z}\|_1$  we have  $\theta \rightarrow 0$  and  $\lim_{t \xrightarrow{+} \|\mathbf{z}\|_1/p} g(t) = 0$ . When  $t \xrightarrow{+} \mathbf{z}_1$ , then from the analysis in Lemma 9 we have  $st + \sum_{\mathbf{z}_i < t} \mathbf{z}_i > pt$ . We claim  $\theta > 0$ . Otherwise, if  $\theta \rightarrow 0$ , then from case 4.3 and case 3 in Theorem 4, we have  $\mathbf{x}_i \rightarrow t$  if  $\mathbf{z}_i \geq t$  and  $\mathbf{x}_i \rightarrow \mathbf{z}_i$  if  $\mathbf{z}_i < t$ . Then  $\sum_{i=1}^n \mathbf{x}_i \rightarrow st + \sum_{\mathbf{z}_i < t} \mathbf{z}_i > pt$ , which contradicts with  $\sum_{i=1}^n \mathbf{x}_i \leq pt$ . So  $\theta > 0$ . Then  $r \equiv \text{num}(\mathbf{z}_i - \theta \geq t) \rightarrow 0$  when  $t \xrightarrow{+} \mathbf{z}_1$ . So  $\lim_{t \xrightarrow{+} \mathbf{z}_1} g(t) = p\theta$ . ■

## 5. Numerical Experiments

In this section, We verify the convergence of the proposed methods: the Augmented Lagrangian Multiplier method with direct Babel Function minimization (ALM-BF) and the Alternating Projection method (APM, Algorithm 2). We take  $\Phi$  to be a  $d \times n$  random Gaussian matrix and test on three settings with varying sizes of  $\Phi$ : (1)  $d = 400$ ,  $n = 500$ ; (2)  $d = 800$ ,  $n = 1000$ ; (3)  $d = 1200$ ,  $n = 1500$ . We fix  $m = 50$  and  $p = 20$  in model (7). Thus the redundancy of the effective dictionary  $\mathbf{D}$ ,  $n/m$ , varies on the three settings. In ALM-BF we set  $\gamma = 1.2$ ,  $\varpi = 0.9$ ,  $\underline{\Lambda} = 10^{-20}$ ,  $\bar{\Lambda} = 10^{20}$  and  $\tau = 10^{-5}$ . We run the inner loop of ALM-BF for 10 iterations and 100 iterations respectively and note the method as ALM-BF-5 and ALM-BF-100. We set the threshold  $t$  as the Welch bound  $\sqrt{\frac{n-m}{m(n-1)}}$  in Algorithm 2. Figure 1 plot the curves of the mutual coherence  $\max_{1 \leq i, j \leq n} \frac{|(\mathbf{d}_i, \mathbf{d}_j)|}{\|\mathbf{d}_i\|_2 \|\mathbf{d}_j\|_2}$ , Babel function  $\max_{\Lambda, |\Lambda|=p} \max_{j \notin \Lambda} \sum_{i \in \Lambda} \frac{|(\mathbf{d}_i, \mathbf{d}_j)|}{\|\mathbf{d}_i\|_2 \|\mathbf{d}_j\|_2}$ , constraint violations  $\|\mathbf{X} - \mathbf{Y}\|_F^2$  and  $\|\mathbf{Y} - \mathbf{V}\mathbf{W}\mathbf{V}^T + \mathbf{I}\|_F^2$  vs. iteration respectively for ALM-BF-10, ALM-BF-100 and APM. We run Algorithm 2 for 50 (100; 200) iterations as the initialization procedure for ALM-BF on the setting of  $d = 400$ ,  $n = 500$  ( $d = 800$ ,  $n = 1000$ ;  $d = 1200$ ,  $n = 1500$ ). We can see that both ALM-BF and APM converge well. Since ALM-BF minimizes the Babel function directly while APM only uses an approximated threshold, ALM-BF produces a solution with much lower mutual coherence and Babel function. ALM-BF-5 performs a little worse than ALM-BF-100. In applications with large size matrix  $\mathbf{D}$ , too many inner iterations are not affordable and we can still obtain a good solution with only a few inner iterations. We should mention that the initialization is critical for ALM-BF. Otherwise, it may get stuck at a bad saddle point or local minimum, especially when  $d$  and  $n$  are large.

## References

- J. Bolte, S. Sabach, and M. Teboulle. Proximal alternating linearized minimization for nonconvex and nonsmooth problems. *Mathematical Programming*, 146(1-2):459–494, 2014.



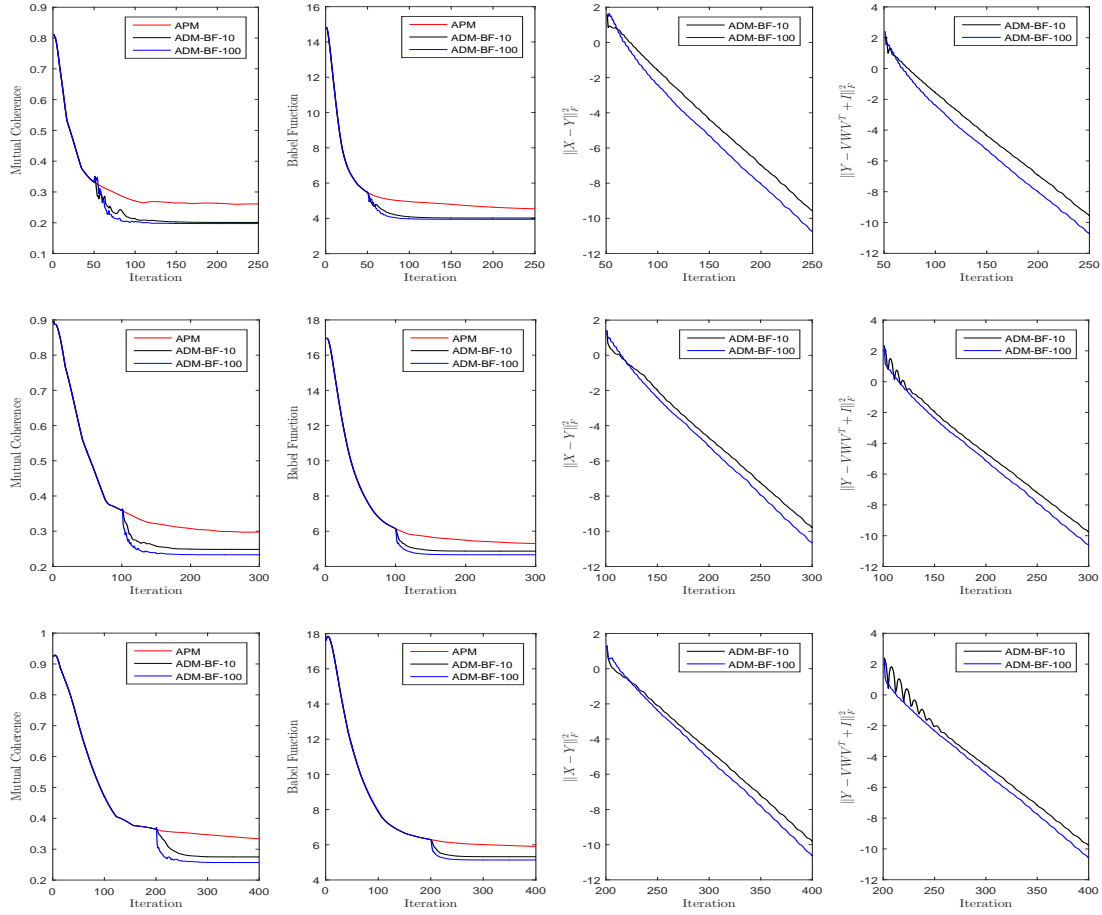

Figure 1: The mutual coherence and Babel function of ADM-BF and APM. The constraint violations of ADM-BF. Top:  $d = 400$ ,  $n = 500$ . Middle:  $d = 800$ ,  $n = 1000$ . Bottom:  $d = 1200$ ,  $n = 1500$

R. Fletcher. Semi-definite matrix constraints in optimization. *SIAM Journal on Control and Optimization*, 23:493–513, 1985.

D. Luke. Prox-regularity of rank constraint sets and implications for algorithms. *Journal of Mathematical Imaging and Vision*, 47(3):231–238, 2013.
